# Supplementary material
Source: PubMed Central journal article supplement (PMC4634046)
Supplement: supp_pp.15.00461_00461suppdata.pdf [file supp_pp.15.00461_00461suppdata.pdf]

## Development

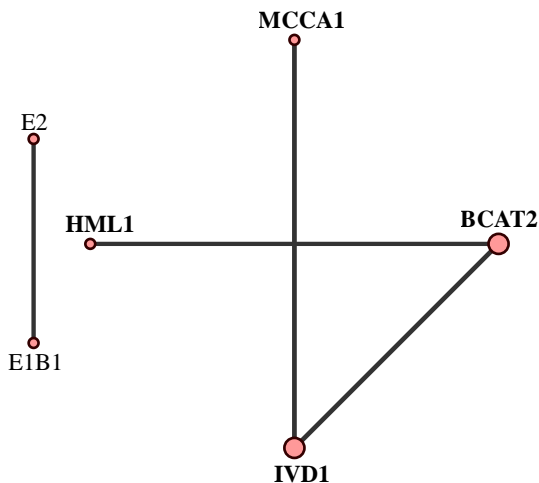

## Stress

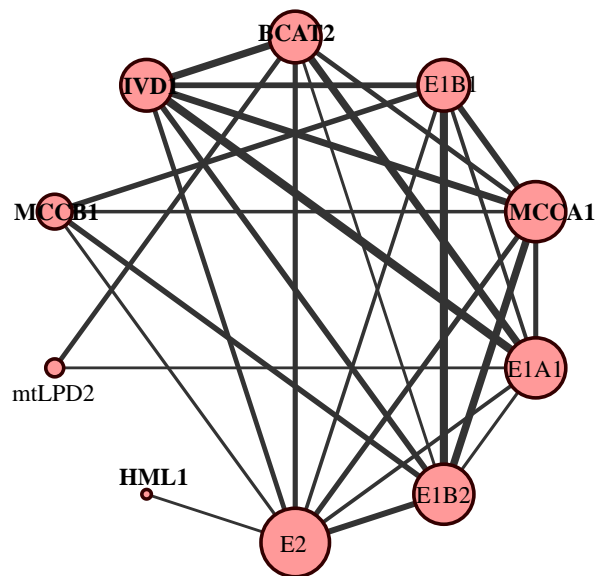

## Diurnal/circadian

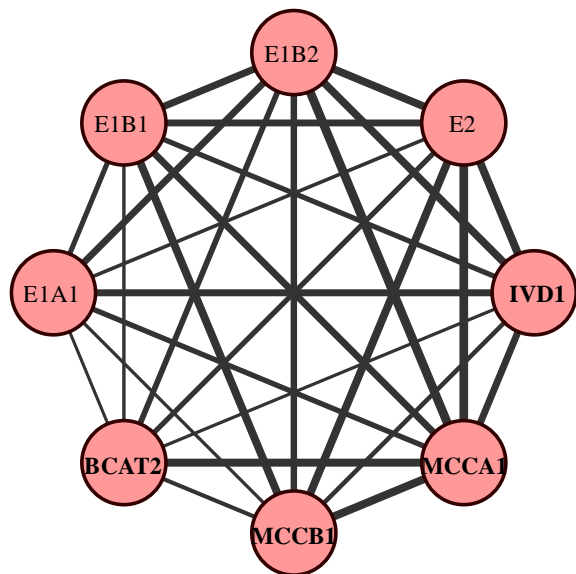

## Light

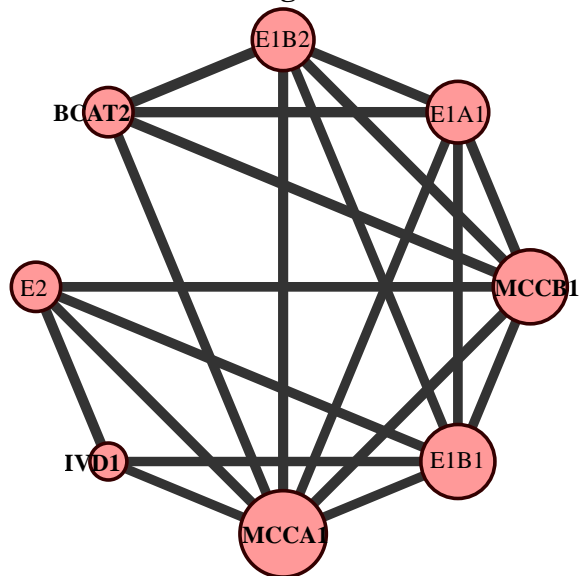

**Supplemental Figure S1.** Graphical representation of transcript correlation modules among the four datasets. Graphs were constructed using development (top left), stress (top right), diurnal/circadian (bottom left), and light (bottom right) datasets. Nodes represent transcripts and edges indicate pairwise PCC values exceeding the threshold in each database. Transcript names of validated genes are in bold, and proposed genes in regular font. The size of nodes corresponds to the connectivity of the transcript (smaller node indicates fewer significant correlations with other transcripts, and *vice versa*). The thickness of edges correlates with their PCC values. See Supplemental Table S1 for PCC values and the corresponding threshold in each dataset. The network graphs were created using Cytoscape.

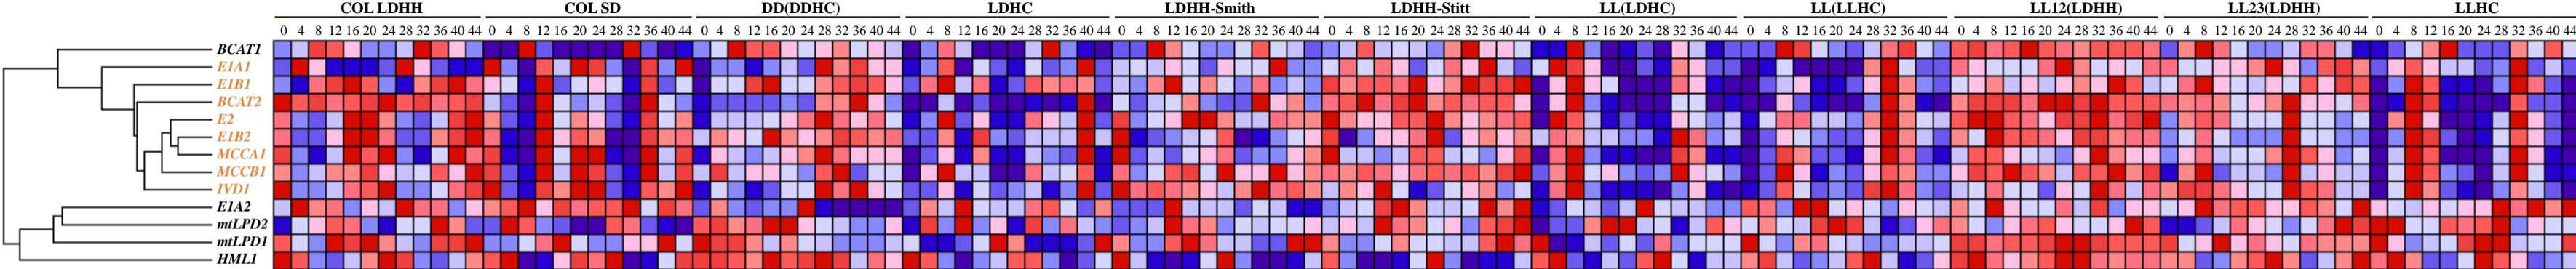

**Supplemental Figure S2.** Transcript profiles for known and proposed BCAA catabolism genes under diurnal/circadian conditions. Microarray data were obtained from the Diurnal database (Mockler et al., 2007), and normalized to the maximum expression levels of each gene in every treatment. Pearson's Correlation Coefficient and average linkage were used for gene clustering. Gene names in orange text represent members of the highly coexpressed module identified from the diurnal/circadian dataset. Refer to the Diurnal database website (<http://diurnal.mocklerlab.org/>) for detailed information on each condition. COL, Col-0; LDHH, 12h light/12h dark and 24h hot; SD, 8h light/16h dark; DD(DDHC), entrained on 24h dark and 12h hot/12h cold, and subjected to 24h dark and 24h hot; LDHC, 12h light/12h dark and 12h hot/12h cold; LDHH-Smith, 12h light/12h dark and 24h hot (Smith et al., 2004); LDHH-Stitt, 12h light/12h dark and 24h hot (Bläsing et al., 2005); LL(LDHC), entrained on LDHC and subjected to 24h light and 24h hot; LL(LLHC), entrained on 24h light and 12h hot/12h cold, and subjected to 24h light and 24h hot; LL12(LDHH), entrained on LDHH and subjected to 24h light and 24h hot; LL23(LDHH), entrained on LDHH and subjected to 24h light and 24h hot; LLHC, 24h light and 12h hot/12h cold.

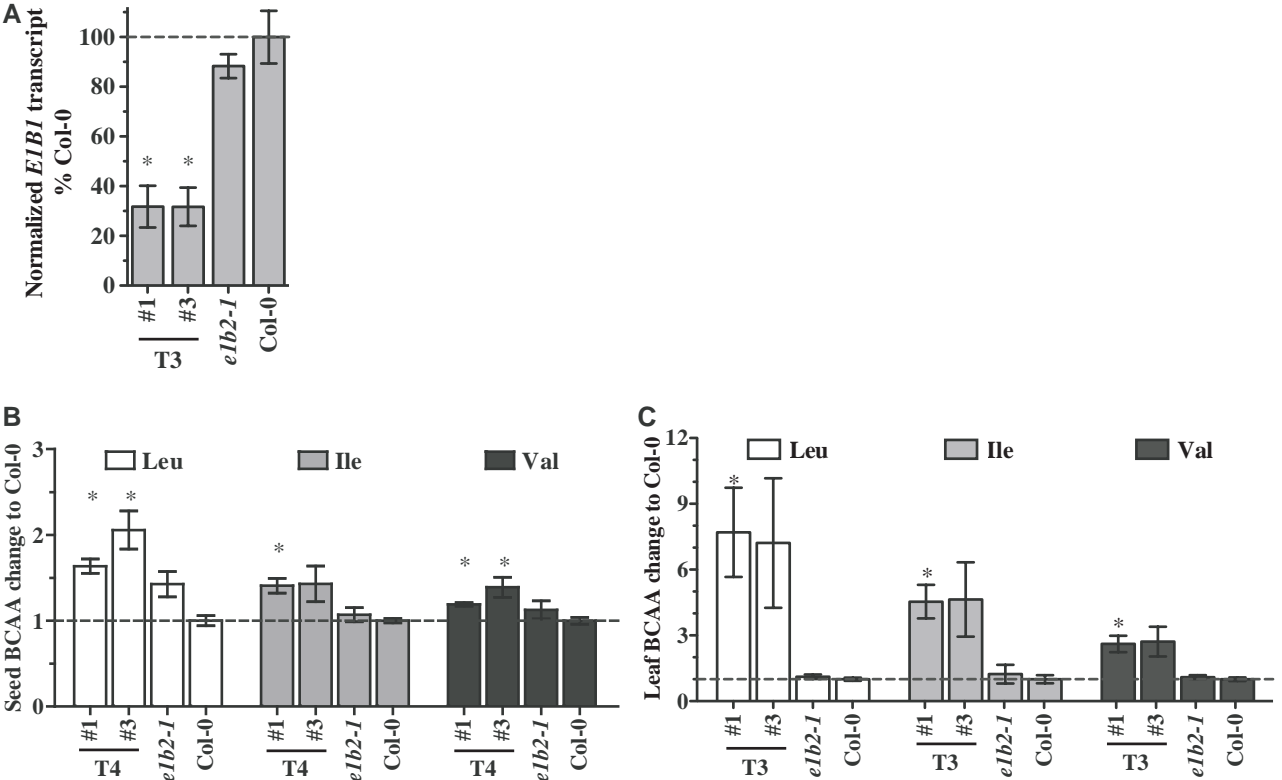

**Supplemental Figure S4.** Transcript and mutant analyses of *EIB1*-silenced *e1b2-1* lines. (A) Relative *EIB1* transcript abundance in two homozygous *EIB1*-silenced *e1b2-1* T3 lines (progeny seed pools of independent primary transformants #1 and #3) by qPCR. The y axis values represent the normalized *EIB1* transcript levels relative to Col-0 (shown as the horizontal dashed line, n=5, mean  $\pm$  SE). The *EIB1* transcript levels were normalized to *ACT2* transcript levels. An asterisk indicates a significant difference from the wild type, determined by the Student's *t*-test ( $p < 0.05$ ). Leaf tissues were harvested by the end of night on a 16h light/8h dark photoperiod. (B) Relative levels of seed free BCAAs in homozygous *EIB1*-silenced *e1b2-1* T4 seeds (progeny seed pools of #1 and #3). The y axis values represent the amino acid levels relative to Col-0 (shown as the dashed line, n=4, mean  $\pm$  SE). An asterisk indicates a significant difference from the wild type, determined by the Student's *t*-test ( $p < 0.05$ ). (C) Relative levels of leaf free BCAAs in homozygous *EIB1*-silenced *e1b2-1* T3 lines (progeny seed pools of #1 and #3) after 6 days in prolonged darkness. The y axis values represent the amino acid levels relative to Col-0 (shown as the dashed line, n=5, mean  $\pm$  SE). An asterisk indicates a significant difference from the wild type, determined by the Student's *t*-test ( $p < 0.05$ ).

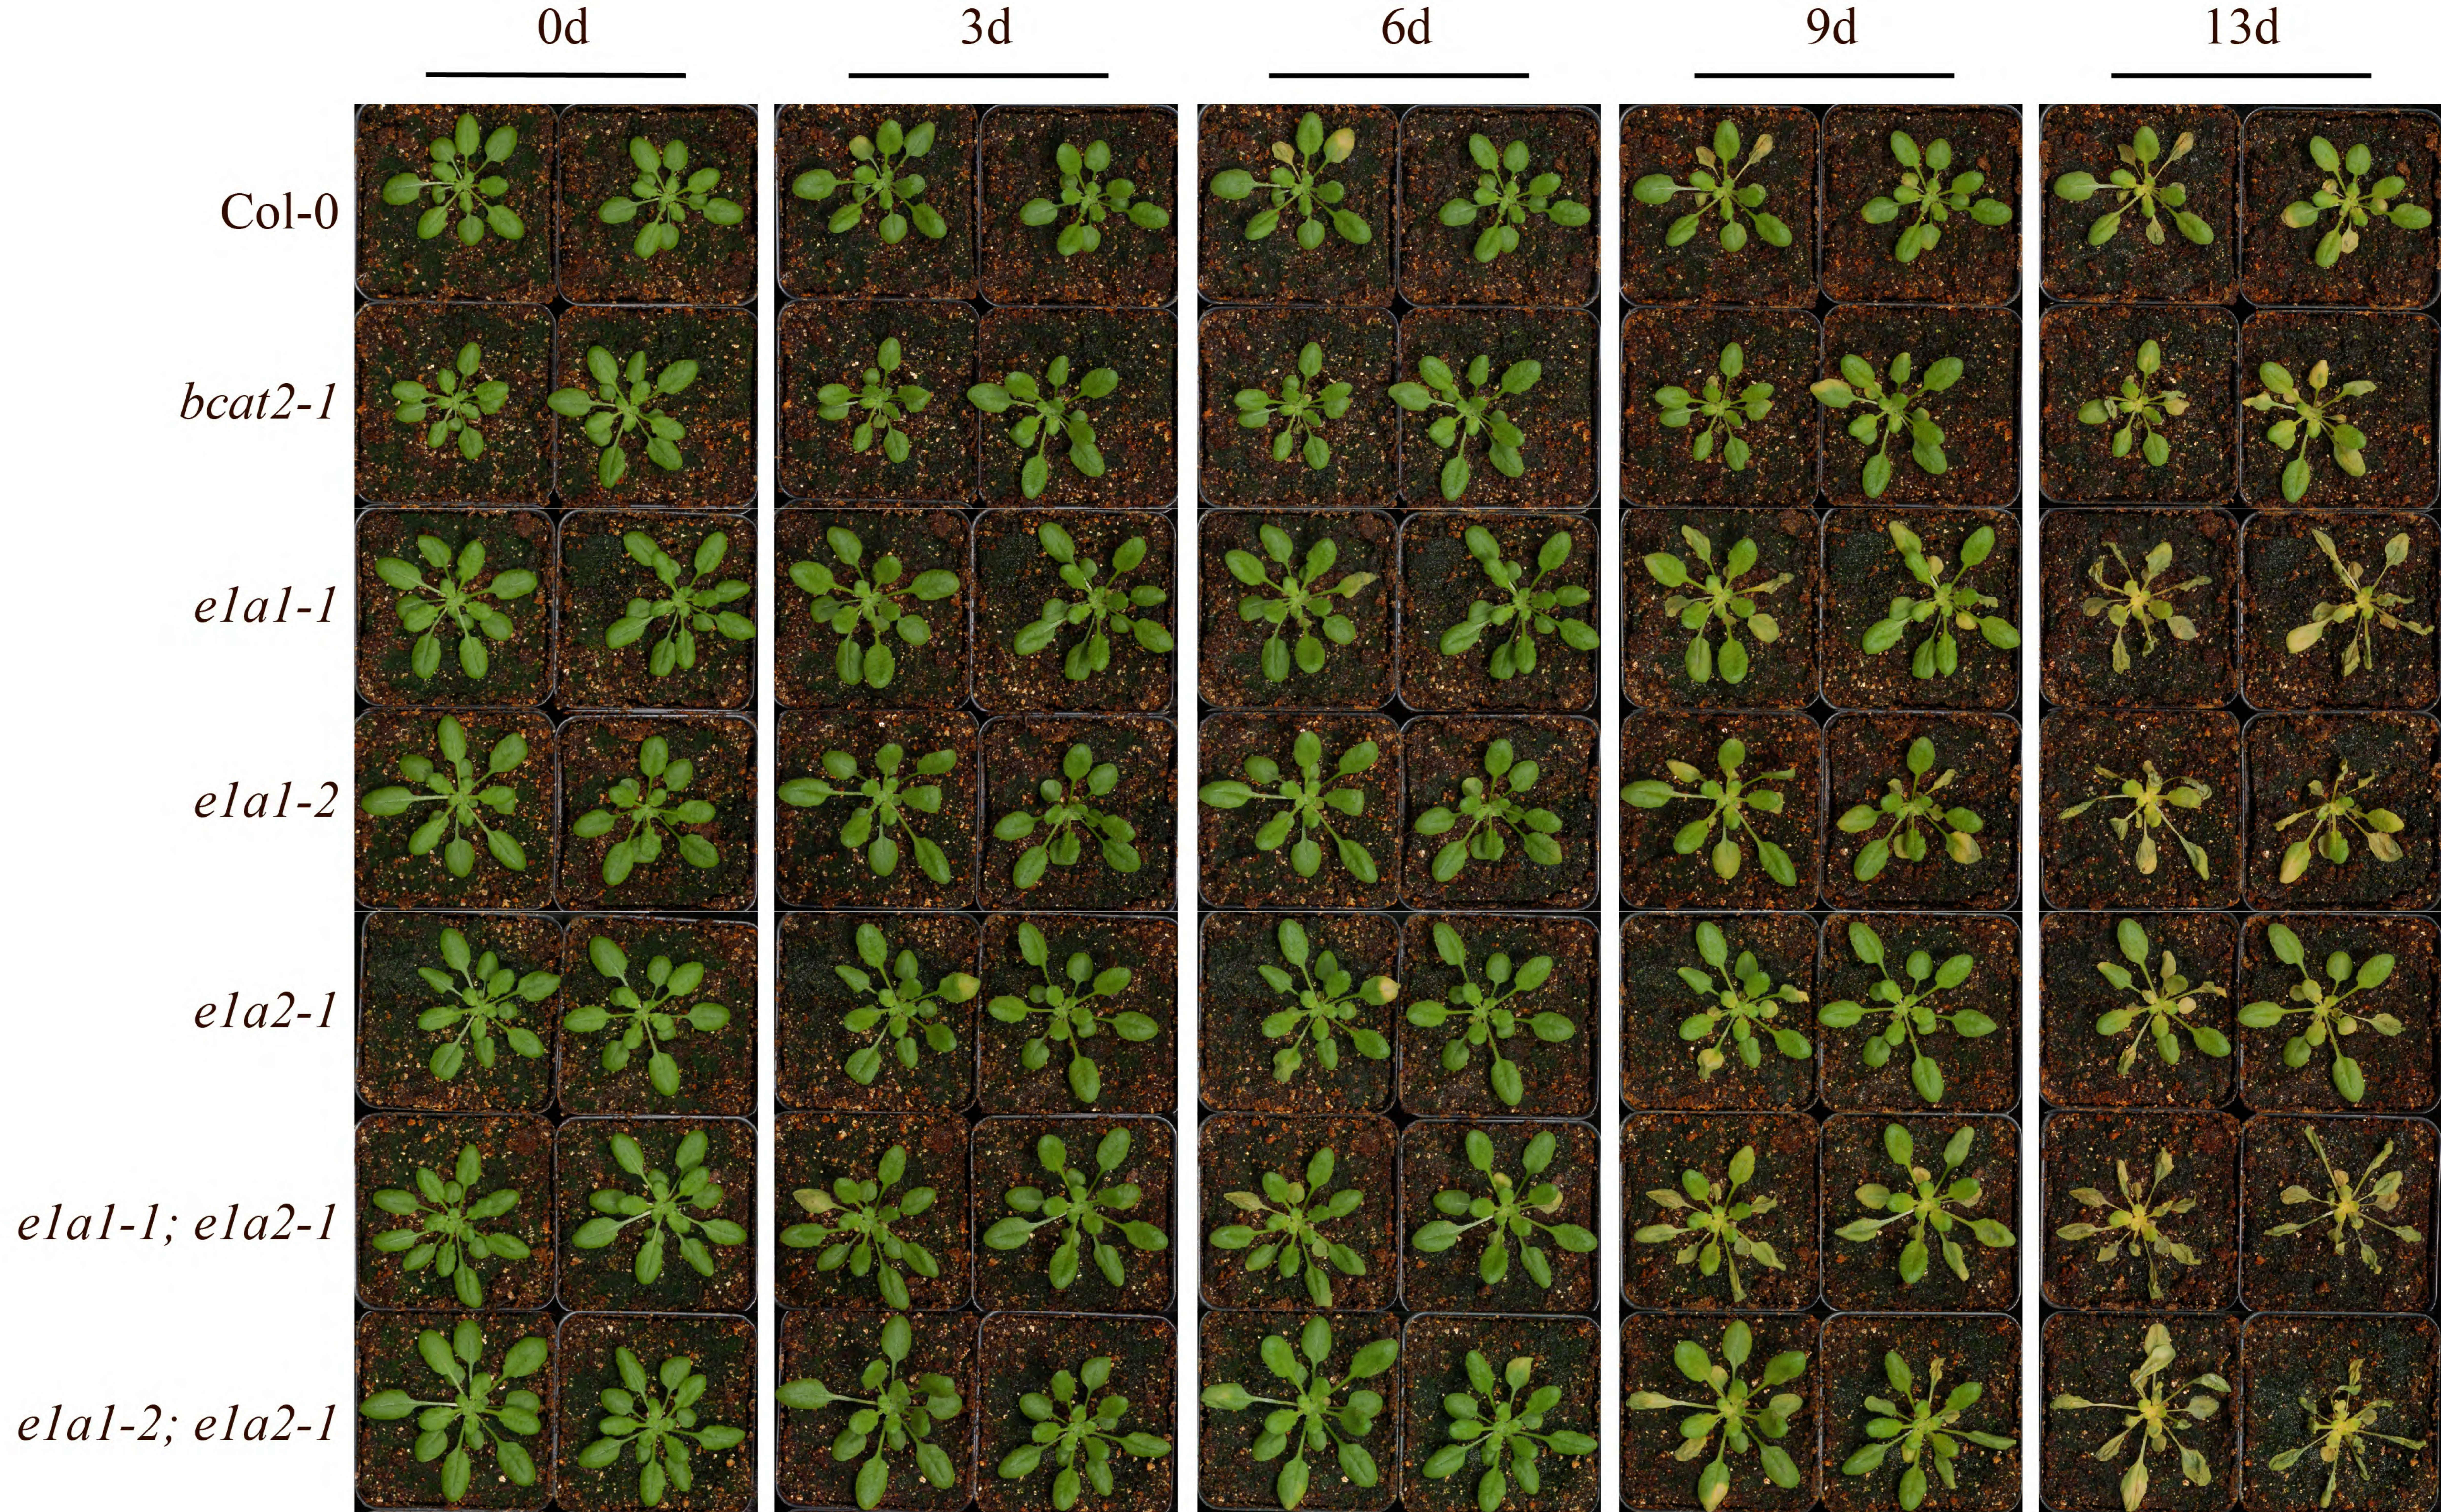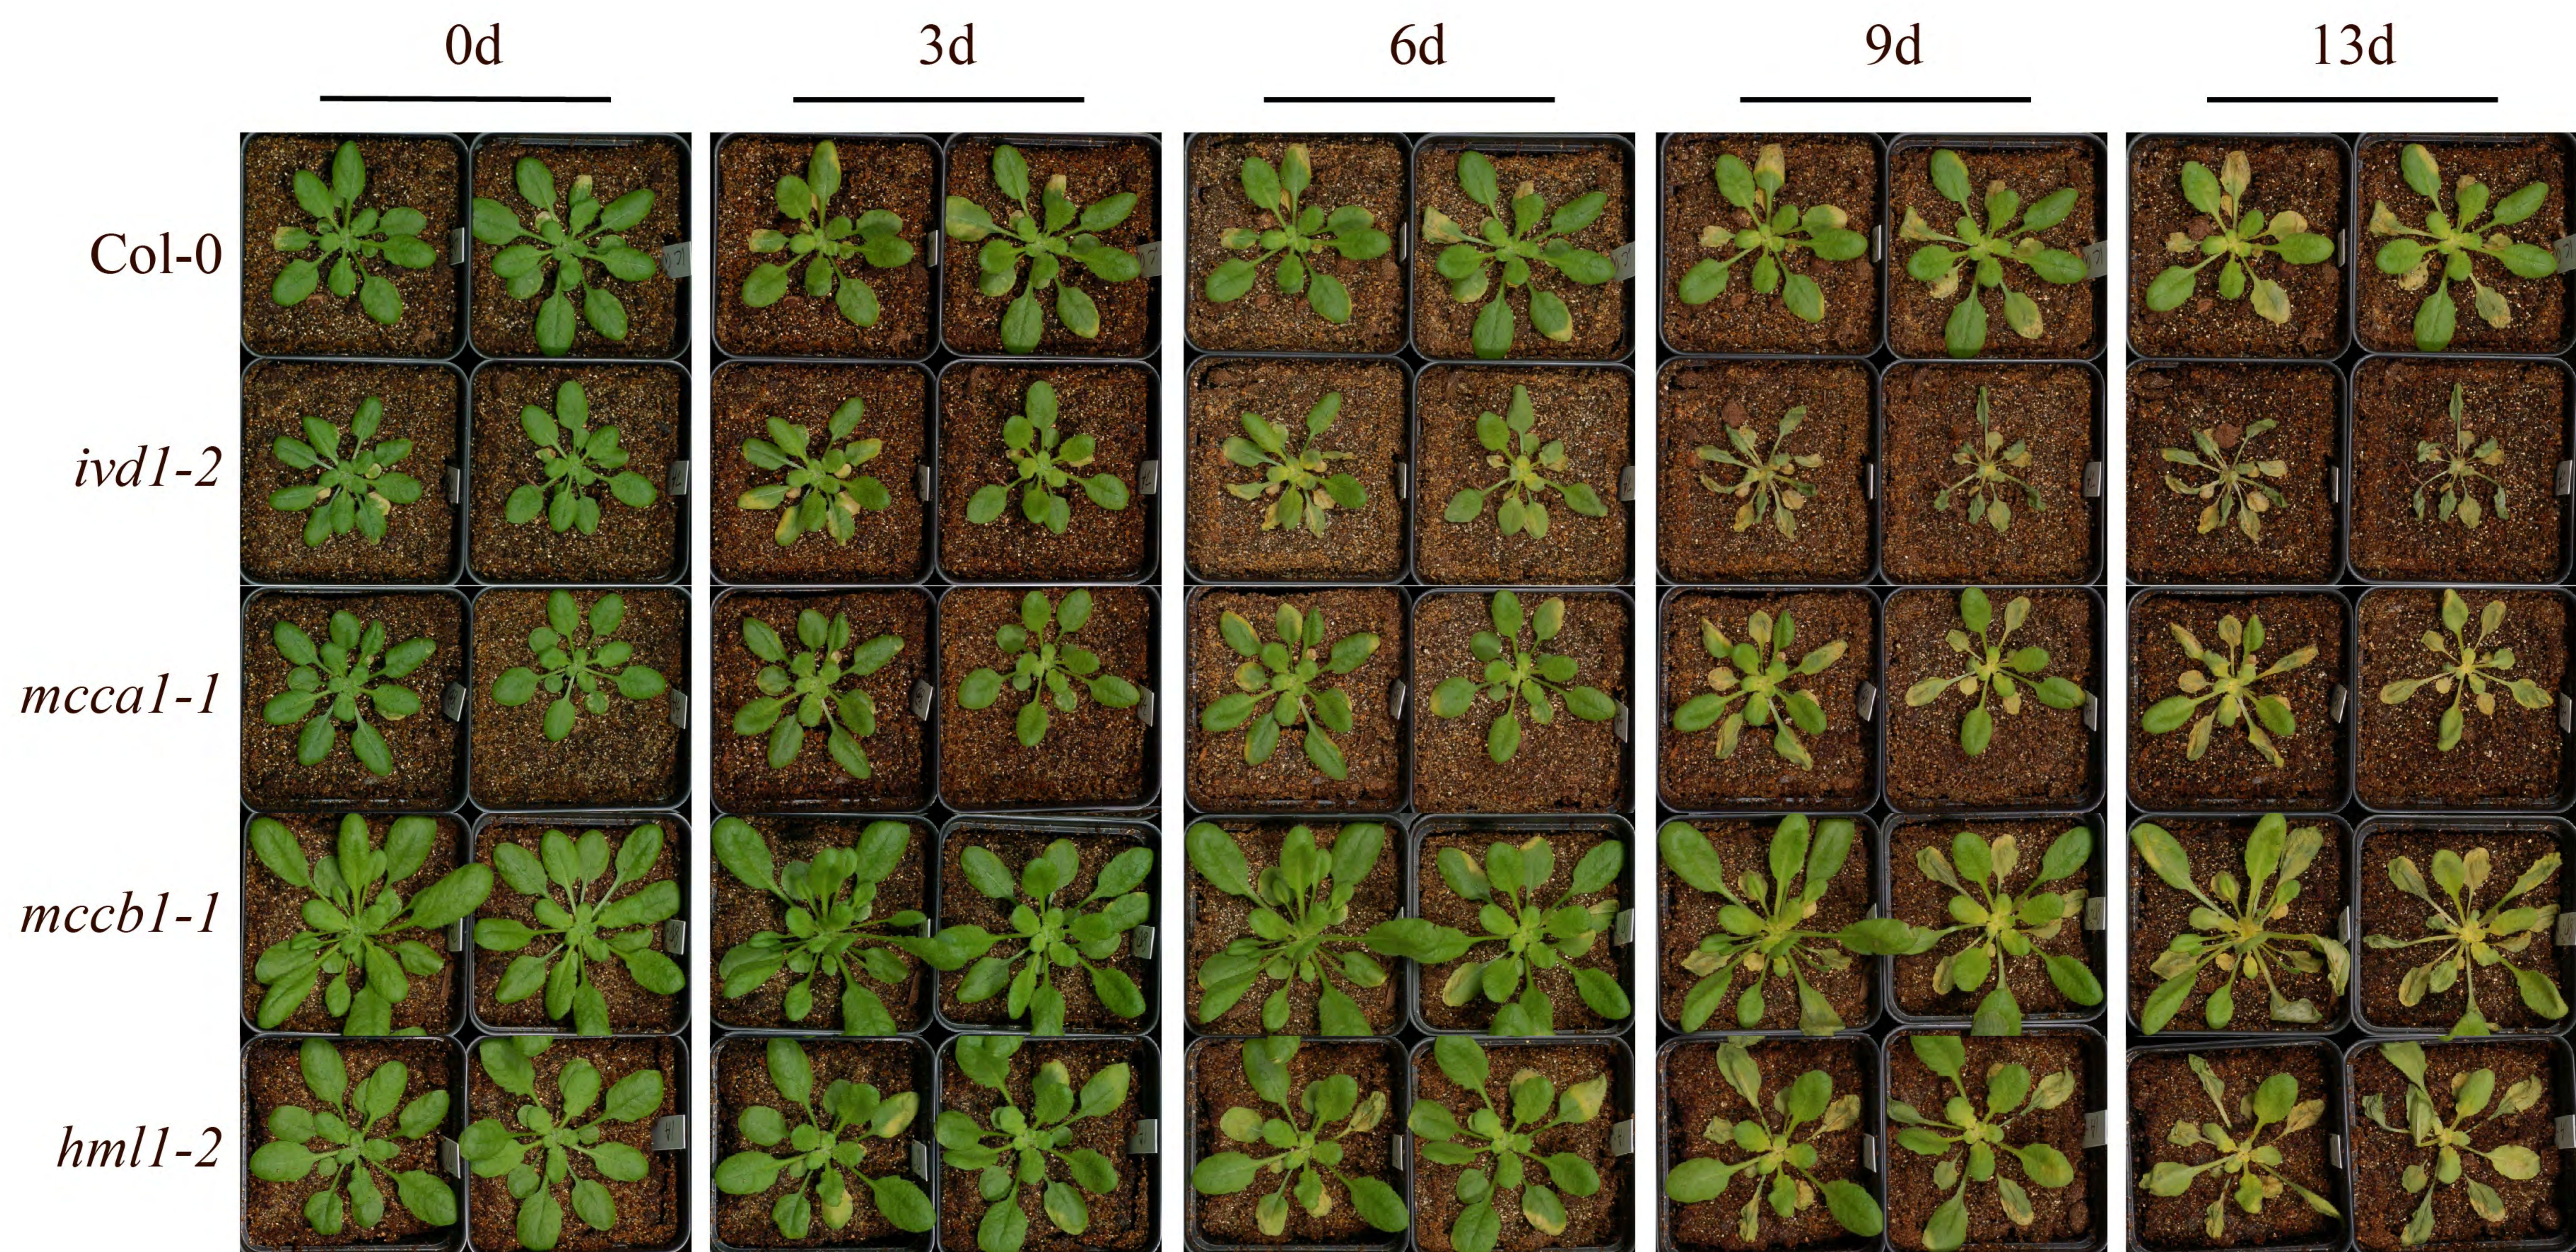

**Supplemental Figure S5.** Phenotypes of BCAA mutants subjected to prolonged darkness. Photographs of 5-week-old, short-day-grown *Arabidopsis* plants taken prior to (0d) and after 3, 6, 9 and 13 days of prolonged darkness. The leaves of *elal-1*, *elal-2*, both *elal; ela2* double mutants, *ivd1-2*, *mcca1-1*, *mccb1-1*, and *hml1-2* were visibly yellowed and dehydrated following 13 days of prolonged darkness compared to the wild type. The *ivd1-2* mutant started showing visible senescence symptoms at day 6. The experiments were done at least three times with similar results, and representative results are shown. Plants in the upper and lower panels were grown and assayed in individual experiments. Two replicates were shown for each mutant at every time point.

**Supplemental Table S1. Pairwise Pearson's Correlation Coefficients (PCCs) for transcripts of BCAA catabolism genes**

PCCs above the 95<sup>th</sup> percentile threshold for each dataset are highlighted in red, and the values are indicated below.

Genes that have PCCs above threshold with one or more other genes are highlighted in yellow.

**Development**

95th percentile of random PCC distribution = 0.60

|        | BCAT1  | BCAT2  | E1A1   | E1A2   | E1B1   | E1B2   | E2     | mtLPD1 | mtLPD2 | IVD1   | MCCA1  | MCCB1  | HML1   |
|--------|--------|--------|--------|--------|--------|--------|--------|--------|--------|--------|--------|--------|--------|
| BCAT1  | 1.000  | 0.031  | 0.586  | 0.576  | 0.454  | 0.379  | 0.433  | -0.049 | -0.426 | -0.124 | -0.123 | -0.034 | -0.006 |
| BCAT2  | 0.031  | 1.000  | 0.550  | -0.173 | 0.356  | 0.177  | 0.138  | -0.280 | 0.220  | 0.704  | 0.580  | 0.044  | 0.666  |
| E1A1   | 0.586  | 0.550  | 1.000  | 0.196  | 0.436  | 0.315  | 0.359  | -0.216 | -0.216 | 0.387  | 0.241  | 0.113  | 0.251  |
| E1A2   | 0.576  | -0.173 | 0.196  | 1.000  | 0.370  | -0.049 | 0.408  | -0.516 | -0.335 | -0.241 | -0.325 | -0.133 | -0.289 |
| E1B1   | 0.454  | 0.356  | 0.436  | 0.370  | 1.000  | 0.410  | 0.673  | -0.544 | 0.008  | 0.443  | 0.411  | 0.140  | 0.163  |
| E1B2   | 0.379  | 0.177  | 0.315  | -0.049 | 0.410  | 1.000  | 0.600  | 0.191  | -0.261 | 0.440  | 0.511  | 0.510  | 0.307  |
| E2     | 0.433  | 0.138  | 0.359  | 0.408  | 0.673  | 0.600  | 1.000  | -0.420 | -0.058 | 0.407  | 0.458  | 0.330  | -0.029 |
| mtLPD1 | -0.049 | -0.280 | -0.216 | -0.516 | -0.544 | 0.191  | -0.420 | 1.000  | -0.105 | -0.282 | -0.075 | 0.206  | 0.018  |
| mtLPD2 | -0.426 | 0.220  | -0.216 | -0.335 | 0.008  | -0.261 | -0.058 | -0.105 | 1.000  | 0.301  | 0.201  | -0.257 | 0.084  |
| IVD1   | -0.124 | 0.704  | 0.387  | -0.241 | 0.443  | 0.440  | 0.407  | -0.282 | 0.301  | 1.000  | 0.706  | 0.251  | 0.599  |
| MCCA1  | -0.123 | 0.580  | 0.241  | -0.325 | 0.411  | 0.511  | 0.458  | -0.075 | 0.201  | 0.706  | 1.000  | 0.548  | 0.322  |
| MCCB1  | -0.034 | 0.044  | 0.113  | -0.133 | 0.140  | 0.510  | 0.330  | 0.206  | -0.257 | 0.251  | 0.548  | 1.000  | -0.041 |
| HML1   | -0.006 | 0.666  | 0.251  | -0.289 | 0.163  | 0.307  | -0.029 | 0.018  | 0.084  | 0.599  | 0.322  | -0.041 | 1.000  |

**Stress**

95th percentile of random PCC distribution = 0.47

|        | BCAT1  | BCAT2  | E1A1   | E1A2   | E1B1   | E1B2   | E2     | mtLPD1 | mtLPD2 | IVD1   | MCCA1  | MCCB1  | HML1   |
|--------|--------|--------|--------|--------|--------|--------|--------|--------|--------|--------|--------|--------|--------|
| BCAT1  | 1.000  | -0.133 | 0.005  | -0.027 | 0.120  | 0.134  | -0.417 | 0.102  | -0.284 | 0.011  | 0.094  | 0.081  | -0.385 |
| BCAT2  | -0.133 | 1.000  | 0.777  | -0.064 | 0.425  | 0.487  | 0.631  | -0.538 | 0.607  | 0.767  | 0.608  | 0.125  | 0.275  |
| E1A1   | 0.005  | 0.777  | 1.000  | -0.149 | 0.545  | 0.497  | 0.543  | -0.462 | 0.477  | 0.839  | 0.622  | 0.282  | 0.464  |
| E1A2   | -0.027 | -0.064 | -0.149 | 1.000  | 0.173  | 0.110  | 0.200  | 0.293  | -0.032 | -0.142 | -0.113 | 0.236  | -0.270 |
| E1B1   | 0.120  | 0.425  | 0.545  | 0.173  | 1.000  | 0.825  | 0.535  | -0.298 | 0.009  | 0.668  | 0.701  | 0.653  | 0.288  |
| E1B2   | 0.134  | 0.487  | 0.497  | 0.110  | 0.825  | 1.000  | 0.685  | -0.287 | 0.022  | 0.669  | 0.787  | 0.656  | 0.239  |
| E2     | -0.417 | 0.631  | 0.543  | 0.200  | 0.535  | 0.685  | 1.000  | -0.250 | 0.357  | 0.605  | 0.634  | 0.504  | 0.480  |
| mtLPD1 | 0.102  | -0.538 | -0.462 | 0.293  | -0.298 | -0.287 | -0.250 | 1.000  | -0.478 | -0.432 | -0.340 | 0.300  | -0.249 |
| mtLPD2 | -0.284 | 0.607  | 0.477  | -0.032 | 0.009  | 0.022  | 0.357  | -0.478 | 1.000  | 0.393  | 0.113  | -0.330 | 0.202  |
| IVD1   | 0.011  | 0.767  | 0.839  | -0.142 | 0.668  | 0.669  | 0.605  | -0.432 | 0.393  | 1.000  | 0.742  | 0.449  | 0.380  |
| MCCA1  | 0.094  | 0.608  | 0.622  | -0.113 | 0.701  | 0.787  | 0.634  | -0.340 | 0.113  | 0.742  | 1.000  | 0.524  | 0.328  |
| MCCB1  | 0.081  | 0.125  | 0.282  | 0.236  | 0.653  | 0.656  | 0.504  | 0.300  | -0.330 | 0.449  | 0.524  | 1.000  | 0.125  |
| HML1   | -0.385 | 0.275  | 0.464  | -0.270 | 0.288  | 0.239  | 0.480  | -0.249 | 0.202  | 0.380  | 0.328  | 0.125  | 1.000  |

**Diurnal/circadian**

95th percentile of random PCC distribution = 0.45

|        | BCAT1  | BCAT2  | E1A1   | E1A2   | E1B1   | E1B2   | E2     | mtLPD1 | mtLPD2 | IVD1   | MCCA1  | MCCB1  | HML1   |
|--------|--------|--------|--------|--------|--------|--------|--------|--------|--------|--------|--------|--------|--------|
| BCAT1  | 1.000  | 0.195  | -0.017 | -0.109 | 0.287  | 0.155  | 0.186  | 0.059  | -0.392 | -0.002 | 0.227  | 0.298  | -0.278 |
| BCAT2  | 0.195  | 1.000  | 0.497  | -0.222 | 0.515  | 0.670  | 0.633  | -0.152 | -0.334 | 0.506  | 0.816  | 0.565  | -0.092 |
| E1A1   | -0.017 | 0.497  | 1.000  | -0.363 | 0.629  | 0.740  | 0.533  | -0.286 | -0.409 | 0.750  | 0.644  | 0.511  | -0.068 |
| E1A2   | -0.109 | -0.222 | -0.363 | 1.000  | -0.240 | -0.284 | 0.031  | -0.070 | 0.379  | -0.115 | -0.190 | -0.090 | -0.155 |
| E1B1   | 0.287  | 0.515  | 0.629  | -0.240 | 1.000  | 0.756  | 0.745  | -0.173 | -0.487 | 0.635  | 0.746  | 0.811  | -0.005 |
| E1B2   | 0.155  | 0.670  | 0.740  | -0.284 | 0.756  | 1.000  | 0.797  | -0.354 | -0.399 | 0.794  | 0.874  | 0.717  | -0.039 |
| E2     | 0.186  | 0.633  | 0.533  | 0.031  | 0.745  | 0.797  | 1.000  | -0.435 | -0.320 | 0.816  | 0.862  | 0.810  | -0.046 |
| mtLPD1 | 0.059  | -0.152 | -0.286 | -0.070 | -0.173 | -0.354 | -0.435 | 1.000  | -0.107 | -0.627 | -0.320 | -0.110 | 0.204  |
| mtLPD2 | -0.392 | -0.334 | -0.409 | 0.379  | -0.487 | -0.399 | -0.320 | -0.107 | 1.000  | -0.239 | -0.385 | -0.482 | -0.050 |
| IVD1   | -0.002 | 0.506  | 0.750  | -0.115 | 0.635  | 0.794  | 0.816  | -0.627 | -0.239 | 1.000  | 0.748  | 0.591  | -0.161 |
| MCCA1  | 0.227  | 0.816  | 0.644  | -0.190 | 0.746  | 0.874  | 0.862  | -0.320 | -0.385 | 0.748  | 1.000  | 0.820  | -0.006 |
| MCCB1  | 0.298  | 0.565  | 0.511  | -0.090 | 0.811  | 0.717  | 0.810  | -0.110 | -0.482 | 0.591  | 0.820  | 1.000  | 0.071  |
| HML1   | -0.278 | -0.092 | -0.068 | -0.155 | -0.005 | -0.039 | -0.046 | 0.204  | -0.050 | -0.161 | -0.006 | 0.071  | 1.000  |

**Light**

95th percentile of random PCC distribution = 0.90

|        | BCAT1  | BCAT2  | E1A1   | E1A2   | E1B1   | E1B2   | E2     | mtLPD1 | mtLPD2 | IVD1   | MCCA1  | MCCB1  | HML1   |
|--------|--------|--------|--------|--------|--------|--------|--------|--------|--------|--------|--------|--------|--------|
| BCAT1  | 1.000  | 0.622  | 0.589  | -0.146 | 0.612  | 0.618  | 0.510  | -0.388 | -0.398 | 0.520  | 0.589  | 0.555  | -0.210 |
| BCAT2  | 0.622  | 1.000  | 0.972  | 0.101  | 0.894  | 0.983  | 0.843  | -0.762 | -0.328 | 0.785  | 0.931  | 0.958  | -0.752 |
| E1A1   | 0.589  | 0.972  | 1.000  | 0.134  | 0.927  | 0.952  | 0.855  | -0.667 | -0.349 | 0.816  | 0.908  | 0.958  | -0.722 |
| E1A2   | -0.146 | 0.101  | 0.134  | 1.000  | -0.021 | 0.072  | -0.172 | 0.292  | 0.621  | -0.314 | -0.144 | 0.017  | -0.462 |
| E1B1   | 0.612  | 0.894  | 0.927  | -0.021 | 1.000  | 0.908  | 0.935  | -0.630 | -0.544 | 0.912  | 0.906  | 0.923  | -0.567 |
| E1B2   | 0.618  | 0.983  | 0.952  | 0.072  | 0.908  | 1.000  | 0.885  | -0.780 | -0.397 | 0.818  | 0.958  | 0.969  | -0.738 |
| E2     | 0.510  | 0.843  | 0.855  | -0.172 | 0.935  | 0.885  | 1.000  | -0.710 | -0.680 | 0.964  | 0.941  | 0.927  | -0.587 |
| mtLPD1 | -0.388 | -0.762 | -0.667 | 0.292  | -0.630 | -0.780 | -0.710 | 1.000  | 0.328  | -0.664 | -0.796 | -0.738 | 0.472  |
| mtLPD2 | -0.398 | -0.328 | -0.349 | 0.621  | -0.544 | -0.397 | -0.680 | 0.328  | 1.000  | -0.776 | -0.586 | -0.517 | 0.068  |
| IVD1   | 0.520  | 0.785  | 0.816  | -0.314 | 0.912  | 0.818  | 0.964  | -0.664 | -0.776 | 1.000  | 0.907  | 0.886  | -0.452 |
| MCCA1  | 0.589  | 0.931  | 0.908  | -0.144 | 0.906  | 0.958  | 0.941  | -0.796 | -0.586 | 0.907  | 1.000  | 0.973  | -0.645 |
| MCCB1  | 0.555  | 0.958  | 0.958  | 0.017  | 0.923  | 0.969  | 0.927  | -0.738 | -0.517 | 0.886  | 0.973  | 1.000  | -0.722 |
| HML1   | -0.210 | -0.752 | -0.722 | -0.462 | -0.567 | -0.738 | -0.587 | 0.472  | 0.068  | -0.452 | -0.645 | -0.722 | 1.000  |

**Supplemental Table S2. Mutant seed free amino acid profiles**

| Amino acid | <i>bcat1-1</i> |       |                | <i>bcat2-1</i> |       |                | <i>elal-1</i> |       |
|------------|----------------|-------|----------------|----------------|-------|----------------|---------------|-------|
|            | Mean           | SE    | <i>t</i> -test | Mean           | SE    | <i>t</i> -test | Mean          | SE    |
| Ala        | 0.797          | 0.053 | 0.235          | 0.976          | 0.171 | 0.922          | 0.730         | 0.111 |
| Arg        | 1.191          | 0.077 | 0.373          | 1.014          | 0.160 | 0.948          | 1.358         | 0.180 |
| Asn        | 0.970          | 0.072 | 0.905          | 0.722          | 0.095 | 0.294          | 0.860         | 0.051 |
| Asp        | 1.783          | 0.320 | 0.347          | 0.943          | 0.090 | 0.756          | 0.898         | 0.109 |
| Gln        | 1.154          | 0.043 | 0.470          | 0.889          | 0.140 | 0.784          | 0.887         | 0.205 |
| Glu        | 1.170          | 0.068 | 0.504          | 0.874          | 0.105 | 0.507          | 1.036         | 0.298 |
| Gly        | 1.559          | 0.120 | 0.128          | 0.749          | 0.200 | 0.499          | 0.798         | 0.074 |
| His        | 1.084          | 0.021 | 0.482          | 1.562          | 0.183 | 0.052          | 2.276         | 0.444 |
| Ile        | 1.088          | 0.051 | 0.575          | 2.790          | 0.411 | 0.017          | 5.411         | 0.307 |
| Leu        | 1.086          | 0.025 | 0.345          | 3.832          | 0.633 | 0.015          | 1.486         | 0.029 |
| Lys        | 0.994          | 0.032 | 0.952          | 1.528          | 0.338 | 0.237          | 1.064         | 0.076 |
| Met        | 1.030          | 0.044 | 0.869          | 1.582          | 0.512 | 0.373          | 1.089         | 0.091 |
| Phe        | 1.072          | 0.046 | 0.634          | 1.461          | 0.275 | 0.192          | 1.040         | 0.034 |
| Pro        | 1.060          | 0.211 | 0.948          | 1.796          | 0.575 | 0.284          | 1.099         | 0.069 |
| Ser        | 1.012          | 0.063 | 0.950          | 1.342          | 0.239 | 0.249          | 0.973         | 0.160 |
| Thr        | 0.605          | 0.081 | 0.296          | 1.244          | 0.243 | 0.582          | 1.131         | 0.107 |
| Trp        | 1.235          | 0.065 | 0.204          | 1.267          | 0.168 | 0.387          | 0.947         | 0.056 |
| Tyr        | 1.040          | 0.052 | 0.777          | 1.305          | 0.366 | 0.546          | 1.098         | 0.060 |
| Val        | 1.045          | 0.057 | 0.821          | 2.389          | 0.315 | 0.016          | 1.319         | 0.075 |

The mean represents the fold change between the averages of five biological replicates of mutant and wild type. The '*t*-test' indicates the value at which the mean measurement deviates from expectation (for exam

| <i>t</i> -test | <i>ela1-2</i> |       |                | <i>ela2-1</i> |       |                | <i>ela1-1;ela2-1</i> |       |                |
|----------------|---------------|-------|----------------|---------------|-------|----------------|----------------------|-------|----------------|
|                | Mean          | SE    | <i>t</i> -test | Mean          | SE    | <i>t</i> -test | Mean                 | SE    | <i>t</i> -test |
| 0.304          | 0.816         | 0.127 | 0.478          | 0.794         | 0.231 | 0.528          | 0.604                | 0.077 | 0.146          |
| 0.177          | 1.156         | 0.069 | 0.126          | 0.925         | 0.064 | 0.401          | 2.183                | 0.204 | 0.000          |
| 0.494          | 0.813         | 0.052 | 0.374          | 0.965         | 0.094 | 0.870          | 0.621                | 0.035 | 0.119          |
| 0.455          | 0.802         | 0.086 | 0.100          | 1.136         | 0.160 | 0.464          | 0.595                | 0.040 | 0.000          |
| 0.644          | 0.711         | 0.051 | 0.018          | 1.026         | 0.092 | 0.832          | 0.442                | 0.049 | 0.002          |
| 0.915          | 0.689         | 0.092 | 0.035          | 1.339         | 0.214 | 0.212          | 0.433                | 0.052 | 0.000          |
| 0.272          | 0.514         | 0.068 | 0.034          | 0.925         | 0.123 | 0.704          | 0.625                | 0.057 | 0.072          |
| 0.098          | 2.441         | 0.188 | 0.002          | 0.968         | 0.095 | 0.805          | 6.780                | 0.652 | 0.000          |
| 0.003          | 5.832         | 0.223 | 0.000          | 0.972         | 0.040 | 0.787          | 25.395               | 1.064 | 0.000          |
| 0.050          | 1.251         | 0.059 | 0.210          | 0.836         | 0.043 | 0.376          | 56.961               | 3.316 | 0.000          |
| 0.641          | 0.873         | 0.075 | 0.363          | 0.872         | 0.087 | 0.384          | 1.405                | 0.135 | 0.019          |
| 0.561          | 0.984         | 0.098 | 0.919          | 0.984         | 0.063 | 0.903          | 2.181                | 0.136 | 0.000          |
| 0.570          | 0.978         | 0.032 | 0.749          | 1.001         | 0.056 | 0.991          | 1.714                | 0.081 | 0.000          |
| 0.399          | 1.043         | 0.075 | 0.714          | 0.996         | 0.097 | 0.976          | 1.214                | 0.062 | 0.073          |
| 0.890          | 0.772         | 0.039 | 0.074          | 1.077         | 0.071 | 0.518          | 2.165                | 0.166 | 0.000          |
| 0.344          | 0.848         | 0.036 | 0.020          | 1.081         | 0.125 | 0.563          | 0.642                | 0.089 | 0.001          |
| 0.527          | 1.164         | 0.105 | 0.232          | 0.869         | 0.044 | 0.113          | 1.077                | 0.087 | 0.411          |
| 0.453          | 1.083         | 0.123 | 0.626          | 0.902         | 0.070 | 0.467          | 1.259                | 0.077 | 0.082          |
| 0.027          | 1.315         | 0.081 | 0.023          | 1.004         | 0.055 | 0.964          | 8.355                | 0.399 | 0.000          |

nts and Col-0 grown at the same time.

ple '0.01' means significant at <0.01).

| <i>el1-2;ela2-1</i> |       |                | <i>elb2-1</i> |       |                | <i>ivd1-2</i> |       |                |       |
|---------------------|-------|----------------|---------------|-------|----------------|---------------|-------|----------------|-------|
| Mean                | SE    | <i>t</i> -test | Mean          | SE    | <i>t</i> -test | Mean          | SE    | <i>t</i> -test | Mean  |
| 0.618               | 0.060 | 0.156          | 1.284         | 0.071 | 0.023          | 3.178         | 0.145 | 0.002          | 0.781 |
| 2.394               | 0.164 | 0.000          | 1.843         | 0.226 | 0.030          | 10.673        | 0.325 | 0.000          | 1.085 |
| 0.578               | 0.029 | 0.094          | 1.421         | 0.121 | 0.035          | 1.392         | 0.046 | 0.015          | 0.541 |
| 0.638               | 0.027 | 0.000          | 1.212         | 0.079 | 0.137          | 0.681         | 0.051 | 0.056          | 0.817 |
| 0.491               | 0.042 | 0.001          | 1.236         | 0.115 | 0.156          | 2.604         | 0.103 | 0.001          | 0.684 |
| 0.484               | 0.059 | 0.000          | 1.297         | 0.107 | 0.100          | 0.627         | 0.034 | 0.011          | 0.424 |
| 0.835               | 0.100 | 0.380          | 0.962         | 0.081 | 0.894          | 4.004         | 0.119 | 0.000          | 0.579 |
| 6.935               | 0.495 | 0.000          | 1.641         | 0.117 | 0.016          | 13.354        | 0.690 | 0.001          | 2.234 |
| 27.915              | 1.419 | 0.000          | 1.675         | 0.096 | 0.001          | 15.962        | 0.319 | 0.000          | 4.325 |
| 59.784              | 2.448 | 0.000          | 1.591         | 0.110 | 0.005          | 19.107        | 0.375 | 0.000          | 5.811 |
| 1.597               | 0.160 | 0.011          | 1.419         | 0.127 | 0.041          | 4.869         | 0.140 | 0.000          | 0.852 |
| 2.268               | 0.120 | 0.000          | 1.704         | 0.146 | 0.009          | 5.218         | 0.205 | 0.001          | 1.076 |
| 1.803               | 0.069 | 0.000          | 1.421         | 0.135 | 0.049          | 3.123         | 0.106 | 0.000          | 0.969 |
| 1.346               | 0.099 | 0.024          | 1.232         | 0.113 | 0.180          | 2.515         | 0.223 | 0.125          | 0.852 |
| 2.337               | 0.183 | 0.000          | 1.443         | 0.100 | 0.022          | 5.049         | 0.217 | 0.001          | 1.514 |
| 0.759               | 0.073 | 0.013          | 1.037         | 0.193 | 0.888          | 1.648         | 0.077 | 0.039          | 0.785 |
| 1.138               | 0.071 | 0.155          | 1.536         | 0.081 | 0.002          | 7.164         | 0.267 | 0.000          | 0.939 |
| 1.447               | 0.093 | 0.013          | 1.520         | 0.133 | 0.022          | 3.946         | 0.144 | 0.000          | 0.857 |
| 8.928               | 0.407 | 0.000          | 1.596         | 0.115 | 0.007          | 11.116        | 0.332 | 0.000          | 2.323 |



| <i>mcca1-1</i> |                | <i>mccb1-1</i> |       |                | <i>hml1-2</i> |       |                |
|----------------|----------------|----------------|-------|----------------|---------------|-------|----------------|
| SE             | <i>t</i> -test | Mean           | SE    | <i>t</i> -test | Mean          | SE    | <i>t</i> -test |
| 0.053          | 0.072          | 0.915          | 0.101 | 0.526          | 1.433         | 0.178 | 0.088          |
| 0.072          | 0.321          | 1.209          | 0.177 | 0.324          | 2.998         | 0.382 | 0.014          |
| 0.033          | 0.021          | 0.612          | 0.086 | 0.025          | 1.244         | 0.123 | 0.165          |
| 0.085          | 0.269          | 0.720          | 0.073 | 0.116          | 1.057         | 0.136 | 0.762          |
| 0.033          | 0.110          | 0.747          | 0.086 | 0.164          | 1.348         | 0.042 | 0.087          |
| 0.018          | 0.007          | 0.485          | 0.067 | 0.002          | 1.475         | 0.102 | 0.012          |
| 0.133          | 0.432          | 0.892          | 0.035 | 0.824          | 1.668         | 0.298 | 0.272          |
| 0.325          | 0.031          | 2.056          | 0.152 | 0.004          | 3.305         | 0.204 | 0.001          |
| 0.657          | 0.015          | 4.522          | 0.454 | 0.004          | 5.818         | 0.427 | 0.001          |
| 0.777          | 0.008          | 6.405          | 0.798 | 0.006          | 6.591         | 0.410 | 0.001          |
| 0.053          | 0.061          | 0.912          | 0.156 | 0.613          | 1.258         | 0.064 | 0.022          |
| 0.109          | 0.553          | 1.127          | 0.147 | 0.458          | 1.765         | 0.227 | 0.041          |
| 0.053          | 0.781          | 1.139          | 0.133 | 0.426          | 1.268         | 0.109 | 0.115          |
| 0.216          | 0.600          | 0.886          | 0.117 | 0.581          | 2.038         | 0.475 | 0.114          |
| 0.139          | 0.027          | 1.416          | 0.142 | 0.054          | 2.257         | 0.216 | 0.008          |
| 0.113          | 0.225          | 0.834          | 0.053 | 0.256          | 1.207         | 0.224 | 0.449          |
| 0.116          | 0.649          | 1.054          | 0.083 | 0.583          | 2.378         | 0.245 | 0.010          |
| 0.084          | 0.219          | 0.940          | 0.046 | 0.456          | 1.423         | 0.173 | 0.088          |
| 0.230          | 0.009          | 2.726          | 0.222 | 0.003          | 3.645         | 0.305 | 0.003          |

**Supplemental Table S3. Mutant leaf free amino acid profiles in prolonged darkness**The mean represents the average of five biological replicates ( $\mu\text{mol/mg}$ ).Significance by Student's *t*-test:*p*<0.05*p*<0.01*p*<0.001**0d in dark**

| Amino acid | Col-0 |       | <i>bcat2-1</i> |       |                | <i>e1a1-1</i> |       |                | Mean  |
|------------|-------|-------|----------------|-------|----------------|---------------|-------|----------------|-------|
|            | Mean  | SE    | Mean           | SE    | <i>t</i> -test | Mean          | SE    | <i>t</i> -test |       |
| Ala        | 1.370 | 0.086 | 1.557          | 0.202 | 0.412          | 1.312         | 0.071 | 0.607          | 1.392 |
| Arg        | 0.032 | 0.006 | 0.051          | 0.010 | 0.123          | 0.041         | 0.008 | 0.369          | 0.030 |
| Asn        | 0.123 | 0.010 | 0.115          | 0.015 | 0.641          | 0.114         | 0.008 | 0.475          | 0.122 |
| Asp        | 1.551 | 0.194 | 1.411          | 0.163 | 0.587          | 1.284         | 0.122 | 0.260          | 1.472 |
| Gln        | 0.877 | 0.053 | 0.966          | 0.115 | 0.496          | 0.904         | 0.072 | 0.773          | 0.989 |
| Glu        | 6.200 | 0.309 | 5.765          | 0.362 | 0.373          | 5.374         | 0.346 | 0.092          | 5.958 |
| Gly        | 0.271 | 0.034 | 0.241          | 0.046 | 0.608          | 0.231         | 0.044 | 0.478          | 0.225 |
| His        | 0.078 | 0.003 | 0.116          | 0.012 | <b>0.010</b>   | 0.093         | 0.004 | <b>0.013</b>   | 0.089 |
| Ile        | 0.042 | 0.004 | 0.059          | 0.009 | 0.108          | 0.031         | 0.003 | 0.060          | 0.036 |
| Leu        | 0.070 | 0.007 | 0.138          | 0.027 | <b>0.036</b>   | 0.073         | 0.006 | 0.779          | 0.068 |
| Lys        | 0.106 | 0.007 | 0.123          | 0.009 | 0.153          | 0.108         | 0.008 | 0.873          | 0.111 |
| Met        | 0.023 | 0.002 | 0.023          | 0.002 | 0.991          | 0.024         | 0.003 | 0.767          | 0.027 |
| Phe        | 0.122 | 0.004 | 0.144          | 0.010 | 0.061          | 0.120         | 0.004 | 0.765          | 0.124 |
| Pro        | 0.168 | 0.014 | 0.177          | 0.013 | 0.643          | 0.167         | 0.008 | 0.935          | 0.171 |
| Ser        | 0.413 | 0.020 | 0.535          | 0.062 | 0.086          | 0.332         | 0.031 | <b>0.044</b>   | 0.374 |
| Thr        | 0.367 | 0.036 | 0.422          | 0.058 | 0.431          | 0.275         | 0.021 | <b>0.043</b>   | 0.354 |
| Trp        | 0.021 | 0.001 | 0.031          | 0.003 | <b>0.008</b>   | 0.022         | 0.002 | 0.526          | 0.020 |
| Tyr        | 0.030 | 0.002 | 0.045          | 0.007 | 0.056          | 0.027         | 0.002 | 0.392          | 0.025 |
| Val        | 0.155 | 0.007 | 0.232          | 0.032 | <b>0.042</b>   | 0.167         | 0.007 | 0.277          | 0.166 |

**3d in dark**

| Amino acid | Col-0 |       | <i>bcat2-1</i> |       |                | <i>e1a1-1</i> |       |                | Mean  |
|------------|-------|-------|----------------|-------|----------------|---------------|-------|----------------|-------|
|            | Mean  | SE    | Mean           | SE    | <i>t</i> -test | Mean          | SE    | <i>t</i> -test |       |
| Ala        | 2.477 | 0.130 | 2.216          | 0.195 | 0.283          | 1.738         | 0.079 | <b>0.000</b>   | 2.008 |
| Arg        | 2.361 | 0.137 | 2.508          | 0.145 | 0.472          | 2.356         | 0.218 | 0.983          | 2.291 |
| Asn        | 1.366 | 0.064 | 1.453          | 0.109 | 0.496          | 1.429         | 0.096 | 0.593          | 1.675 |
| Asp        | 0.588 | 0.068 | 0.998          | 0.100 | <b>0.004</b>   | 0.985         | 0.073 | <b>0.001</b>   | 1.083 |
| Gln        | 0.780 | 0.036 | 0.779          | 0.075 | 0.987          | 0.722         | 0.061 | 0.427          | 0.857 |
| Glu        | 6.654 | 0.432 | 5.955          | 0.458 | 0.282          | 5.431         | 0.134 | <b>0.021</b>   | 6.128 |
| Gly        | 0.297 | 0.043 | 0.267          | 0.041 | 0.622          | 0.226         | 0.016 | 0.150          | 0.252 |
| His        | 1.423 | 0.073 | 1.460          | 0.114 | 0.793          | 1.323         | 0.068 | 0.328          | 1.370 |
| Ile        | 1.444 | 0.163 | 2.065          | 0.272 | 0.069          | 2.261         | 0.315 | <b>0.038</b>   | 2.062 |
| Leu        | 1.345 | 0.058 | 4.589          | 0.323 | <b>0.000</b>   | 5.377         | 0.206 | <b>0.000</b>   | 5.184 |
| Lys        | 1.347 | 0.084 | 1.413          | 0.157 | 0.714          | 1.308         | 0.089 | 0.753          | 1.401 |
| Met        | 0.072 | 0.005 | 0.085          | 0.008 | 0.167          | 0.087         | 0.005 | <b>0.047</b>   | 0.085 |
| Phe        | 2.685 | 0.121 | 2.773          | 0.219 | 0.728          | 2.664         | 0.101 | 0.896          | 2.662 |
| Pro        | 0.163 | 0.017 | 0.230          | 0.021 | <b>0.022</b>   | 0.170         | 0.016 | 0.749          | 0.187 |

|     |       |       |       |       |       |       |       |              |       |
|-----|-------|-------|-------|-------|-------|-------|-------|--------------|-------|
| Ser | 0.914 | 0.070 | 1.155 | 0.174 | 0.222 | 1.022 | 0.082 | 0.330        | 1.035 |
| Thr | 0.823 | 0.101 | 0.988 | 0.144 | 0.361 | 0.831 | 0.039 | 0.938        | 0.864 |
| Trp | 0.836 | 0.031 | 0.813 | 0.024 | 0.580 | 0.837 | 0.041 | 0.976        | 0.804 |
| Tyr | 0.996 | 0.059 | 0.980 | 0.069 | 0.858 | 0.972 | 0.056 | 0.772        | 0.969 |
| Val | 3.172 | 0.165 | 3.662 | 0.289 | 0.162 | 3.818 | 0.165 | <b>0.013</b> | 3.836 |

### 6d in dark

| Amino acid | Col-0 |       | <i>bcat2-1</i> |       |                | <i>ela1-1</i> |       |                | Mean  |
|------------|-------|-------|----------------|-------|----------------|---------------|-------|----------------|-------|
|            | Mean  | SE    | Mean           | SE    | <i>t</i> -test | Mean          | SE    | <i>t</i> -test |       |
| Ala        | 2.538 | 0.244 | 1.458          | 0.127 | <b>0.002</b>   | 1.017         | 0.106 | <b>0.000</b>   | 1.342 |
| Arg        | 3.696 | 0.342 | 3.888          | 0.169 | 0.624          | 3.863         | 0.402 | 0.756          | 4.299 |
| Asn        | 2.684 | 0.201 | 2.639          | 0.189 | 0.872          | 2.920         | 0.330 | 0.551          | 3.496 |
| Asp        | 0.971 | 0.084 | 1.362          | 0.084 | <b>0.004</b>   | 1.580         | 0.160 | <b>0.005</b>   | 1.614 |
| Gln        | 1.056 | 0.107 | 0.877          | 0.078 | 0.194          | 0.896         | 0.101 | 0.291          | 1.121 |
| Glu        | 7.951 | 0.630 | 6.966          | 0.452 | 0.222          | 6.192         | 0.552 | 0.050          | 6.683 |
| Gly        | 0.354 | 0.049 | 0.174          | 0.027 | <b>0.006</b>   | 0.222         | 0.042 | 0.055          | 0.200 |
| His        | 2.143 | 0.134 | 2.076          | 0.133 | 0.727          | 2.035         | 0.207 | 0.668          | 2.225 |
| Ile        | 1.571 | 0.162 | 2.699          | 0.279 | <b>0.003</b>   | 3.291         | 0.355 | <b>0.001</b>   | 1.675 |
| Leu        | 1.258 | 0.127 | 6.244          | 0.299 | <b>0.000</b>   | 8.002         | 0.774 | <b>0.000</b>   | 8.223 |
| Lys        | 2.019 | 0.186 | 1.600          | 0.105 | 0.069          | 1.395         | 0.186 | <b>0.029</b>   | 1.572 |
| Met        | 0.119 | 0.009 | 0.141          | 0.012 | 0.153          | 0.158         | 0.017 | 0.055          | 0.183 |
| Phe        | 4.114 | 0.244 | 3.947          | 0.215 | 0.613          | 4.031         | 0.338 | 0.845          | 4.365 |
| Pro        | 0.093 | 0.011 | 0.100          | 0.009 | 0.651          | 0.086         | 0.009 | 0.635          | 0.104 |
| Ser        | 1.753 | 0.213 | 1.480          | 0.149 | 0.311          | 1.457         | 0.265 | 0.397          | 1.344 |
| Thr        | 0.774 | 0.142 | 0.816          | 0.111 | 0.818          | 0.748         | 0.121 | 0.892          | 0.613 |
| Trp        | 1.334 | 0.088 | 1.162          | 0.072 | 0.150          | 1.288         | 0.079 | 0.700          | 1.443 |
| Tyr        | 1.213 | 0.131 | 1.142          | 0.105 | 0.679          | 1.077         | 0.179 | 0.549          | 1.275 |
| Val        | 3.860 | 0.285 | 4.731          | 0.263 | <b>0.037</b>   | 5.475         | 0.459 | <b>0.009</b>   | 6.242 |

### 9d in dark

| Amino acid | Col-0 |       | <i>bcat2-1</i> |       |                | <i>ela1-1</i> |       |                | Mean   |
|------------|-------|-------|----------------|-------|----------------|---------------|-------|----------------|--------|
|            | Mean  | SE    | Mean           | SE    | <i>t</i> -test | Mean          | SE    | <i>t</i> -test |        |
| Ala        | 3.171 | 0.238 | 1.661          | 0.186 | <b>0.000</b>   | 0.861         | 0.076 | <b>0.000</b>   | 0.757  |
| Arg        | 4.141 | 0.422 | 4.035          | 0.382 | 0.854          | 4.011         | 0.197 | 0.784          | 3.615  |
| Asn        | 4.179 | 0.341 | 4.220          | 0.443 | 0.943          | 3.999         | 0.268 | 0.683          | 5.433  |
| Asp        | 0.832 | 0.039 | 1.256          | 0.106 | <b>0.003</b>   | 1.380         | 0.072 | <b>0.000</b>   | 1.532  |
| Gln        | 1.526 | 0.101 | 1.462          | 0.165 | 0.746          | 1.167         | 0.063 | <b>0.009</b>   | 1.554  |
| Glu        | 9.048 | 0.398 | 9.372          | 0.810 | 0.725          | 7.713         | 0.557 | 0.069          | 8.139  |
| Gly        | 0.356 | 0.046 | 0.467          | 0.089 | 0.291          | 0.417         | 0.053 | 0.399          | 0.456  |
| His        | 2.377 | 0.097 | 2.601          | 0.199 | 0.330          | 2.348         | 0.094 | 0.827          | 2.892  |
| Ile        | 1.056 | 0.069 | 2.555          | 0.330 | <b>0.001</b>   | 3.215         | 0.478 | <b>0.001</b>   | 3.576  |
| Leu        | 0.838 | 0.065 | 6.663          | 0.416 | <b>0.000</b>   | 9.405         | 0.178 | <b>0.000</b>   | 11.447 |
| Lys        | 1.943 | 0.150 | 1.611          | 0.149 | 0.134          | 1.130         | 0.105 | <b>0.000</b>   | 1.007  |
| Met        | 0.146 | 0.012 | 0.178          | 0.021 | 0.210          | 0.225         | 0.015 | <b>0.001</b>   | 0.381  |
| Phe        | 4.289 | 0.216 | 4.367          | 0.264 | 0.823          | 4.427         | 0.121 | 0.588          | 5.454  |
| Pro        | 0.092 | 0.009 | 0.114          | 0.010 | 0.137          | 0.109         | 0.007 | 0.163          | 0.113  |
| Ser        | 1.979 | 0.140 | 1.823          | 0.242 | 0.586          | 1.215         | 0.064 | <b>0.000</b>   | 1.912  |
| Thr        | 0.568 | 0.041 | 0.656          | 0.084 | 0.363          | 0.540         | 0.049 | 0.662          | 1.084  |

|     |       |       |       |       |              |       |       |              |       |
|-----|-------|-------|-------|-------|--------------|-------|-------|--------------|-------|
| Trp | 1.543 | 0.072 | 1.618 | 0.098 | 0.543        | 1.640 | 0.092 | 0.416        | 2.406 |
| Tyr | 1.456 | 0.147 | 1.340 | 0.229 | 0.676        | 1.065 | 0.156 | 0.084        | 1.444 |
| Val | 3.482 | 0.142 | 5.158 | 0.287 | <b>0.000</b> | 6.082 | 0.148 | <b>0.000</b> | 7.260 |

---

| <i>ela1-2</i> |                | <i>ela2-1</i> |       |                | <i>ela1-1;ela2-1</i> |       |                | <i>ela1-2;ela2</i> |       |
|---------------|----------------|---------------|-------|----------------|----------------------|-------|----------------|--------------------|-------|
| SE            | <i>t</i> -test | Mean          | SE    | <i>t</i> -test | Mean                 | SE    | <i>t</i> -test | Mean               | SE    |
| 0.100         | 0.868          | 1.299         | 0.107 | 0.610          | 1.331                | 0.134 | 0.809          | 1.566              | 0.072 |
| 0.006         | 0.790          | 0.036         | 0.006 | 0.618          | 0.037                | 0.007 | 0.570          | 0.057              | 0.008 |
| 0.009         | 0.909          | 0.123         | 0.010 | 0.966          | 0.135                | 0.016 | 0.555          | 0.118              | 0.009 |
| 0.153         | 0.753          | 1.455         | 0.159 | 0.706          | 1.672                | 0.201 | 0.671          | 1.665              | 0.194 |
| 0.076         | 0.244          | 0.889         | 0.078 | 0.901          | 0.996                | 0.069 | 0.191          | 1.004              | 0.050 |
| 0.361         | 0.617          | 5.799         | 0.334 | 0.390          | 6.500                | 0.294 | 0.491          | 6.393              | 0.272 |
| 0.024         | 0.286          | 0.201         | 0.038 | 0.182          | 0.206                | 0.036 | 0.205          | 0.196              | 0.024 |
| 0.006         | 0.126          | 0.094         | 0.004 | <b>0.012</b>   | 0.094                | 0.007 | 0.060          | 0.108              | 0.008 |
| 0.004         | 0.271          | 0.048         | 0.004 | 0.319          | 0.048                | 0.007 | 0.475          | 0.044              | 0.007 |
| 0.003         | 0.785          | 0.088         | 0.009 | 0.125          | 0.085                | 0.008 | 0.175          | 0.115              | 0.015 |
| 0.010         | 0.707          | 0.113         | 0.009 | 0.567          | 0.114                | 0.009 | 0.532          | 0.127              | 0.012 |
| 0.002         | 0.137          | 0.021         | 0.001 | 0.363          | 0.025                | 0.003 | 0.527          | 0.027              | 0.002 |
| 0.004         | 0.699          | 0.132         | 0.004 | 0.103          | 0.127                | 0.007 | 0.507          | 0.128              | 0.006 |
| 0.013         | 0.856          | 0.165         | 0.011 | 0.872          | 0.178                | 0.014 | 0.593          | 0.192              | 0.015 |
| 0.031         | 0.305          | 0.501         | 0.056 | 0.162          | 0.520                | 0.088 | 0.263          | 0.584              | 0.059 |
| 0.035         | 0.804          | 0.377         | 0.027 | 0.826          | 0.457                | 0.083 | 0.335          | 0.499              | 0.075 |
| 0.001         | 0.393          | 0.025         | 0.002 | 0.083          | 0.024                | 0.001 | 0.104          | 0.027              | 0.002 |
| 0.002         | 0.124          | 0.029         | 0.002 | 0.820          | 0.031                | 0.003 | 0.722          | 0.035              | 0.003 |
| 0.006         | 0.280          | 0.175         | 0.012 | 0.188          | 0.174                | 0.012 | 0.213          | 0.212              | 0.019 |

| <i>ela1-2</i> |                | <i>ela2-1</i> |       |                | <i>ela1-1;ela2-1</i> |       |                | <i>ela1-2;ela2</i> |       |
|---------------|----------------|---------------|-------|----------------|----------------------|-------|----------------|--------------------|-------|
| SE            | <i>t</i> -test | Mean          | SE    | <i>t</i> -test | Mean                 | SE    | <i>t</i> -test | Mean               | SE    |
| 0.150         | <b>0.030</b>   | 3.625         | 0.402 | <b>0.022</b>   | 2.668                | 0.207 | 0.448          | 2.820              | 0.299 |
| 0.231         | 0.799          | 2.549         | 0.300 | 0.580          | 2.309                | 0.241 | 0.853          | 2.659              | 0.329 |
| 0.119         | <b>0.038</b>   | 1.842         | 0.176 | <b>0.029</b>   | 1.777                | 0.145 | <b>0.023</b>   | 1.959              | 0.200 |
| 0.098         | <b>0.001</b>   | 1.029         | 0.116 | <b>0.006</b>   | 1.337                | 0.062 | <b>0.000</b>   | 1.545              | 0.123 |
| 0.061         | 0.301          | 1.148         | 0.138 | <b>0.030</b>   | 0.975                | 0.077 | <b>0.040</b>   | 1.180              | 0.171 |
| 0.201         | 0.291          | 7.925         | 0.481 | 0.066          | 7.001                | 0.249 | 0.497          | 7.250              | 0.358 |
| 0.042         | 0.464          | 0.327         | 0.030 | 0.569          | 0.291                | 0.044 | 0.932          | 0.298              | 0.048 |
| 0.070         | 0.602          | 1.569         | 0.082 | 0.203          | 1.507                | 0.060 | 0.388          | 1.524              | 0.083 |
| 0.329         | 0.116          | 1.528         | 0.206 | 0.751          | 2.404                | 0.374 | <b>0.036</b>   | 2.169              | 0.502 |
| 0.143         | <b>0.000</b>   | 1.779         | 0.177 | <b>0.043</b>   | 6.083                | 0.195 | <b>0.000</b>   | 6.480              | 0.261 |
| 0.074         | 0.632          | 1.767         | 0.176 | 0.053          | 1.474                | 0.112 | 0.374          | 1.747              | 0.097 |
| 0.005         | 0.079          | 0.091         | 0.012 | 0.159          | 0.112                | 0.010 | <b>0.002</b>   | 0.114              | 0.008 |
| 0.117         | 0.892          | 3.016         | 0.198 | 0.176          | 2.861                | 0.117 | 0.309          | 2.965              | 0.103 |
| 0.018         | 0.325          | 0.227         | 0.033 | 0.105          | 0.269                | 0.027 | <b>0.004</b>   | 0.273              | 0.028 |

|       |              |       |       |              |       |       |              |       |       |
|-------|--------------|-------|-------|--------------|-------|-------|--------------|-------|-------|
| 0.068 | 0.230        | 1.814 | 0.241 | <b>0.005</b> | 1.456 | 0.120 | <b>0.002</b> | 1.589 | 0.150 |
| 0.049 | 0.716        | 1.526 | 0.229 | <b>0.017</b> | 1.485 | 0.177 | <b>0.006</b> | 1.470 | 0.199 |
| 0.035 | 0.510        | 0.906 | 0.035 | 0.153        | 0.799 | 0.021 | 0.342        | 0.831 | 0.027 |
| 0.080 | 0.788        | 1.174 | 0.128 | 0.234        | 1.035 | 0.064 | 0.657        | 1.190 | 0.107 |
| 0.173 | <b>0.013</b> | 3.636 | 0.210 | 0.102        | 3.957 | 0.184 | <b>0.005</b> | 4.310 | 0.185 |

| <i>ela1-2</i> |                | <i>ela2-1</i> |       |                | <i>ela1-1;ela2-1</i> |       |                | <i>ela1-2;ela2</i> |       |
|---------------|----------------|---------------|-------|----------------|----------------------|-------|----------------|--------------------|-------|
| SE            | <i>t</i> -test | Mean          | SE    | <i>t</i> -test | Mean                 | SE    | <i>t</i> -test | Mean               | SE    |
| 0.171         | <b>0.001</b>   | 3.070         | 0.321 | 0.253          | 1.261                | 0.076 | <b>0.000</b>   | 1.412              | 0.129 |
| 0.232         | 0.164          | 3.905         | 0.224 | 0.533          | 4.353                | 0.233 | 0.066          | 4.679              | 0.333 |
| 0.357         | 0.067          | 3.546         | 0.305 | <b>0.032</b>   | 3.486                | 0.311 | 0.051          | 3.786              | 0.340 |
| 0.226         | <b>0.021</b>   | 1.252         | 0.137 | 0.059          | 1.740                | 0.141 | <b>0.000</b>   | 1.988              | 0.190 |
| 0.173         | 0.752          | 1.299         | 0.146 | 0.145          | 1.135                | 0.140 | 0.520          | 1.281              | 0.155 |
| 0.970         | 0.290          | 8.700         | 0.868 | 0.415          | 6.671                | 0.536 | 0.212          | 7.415              | 0.632 |
| 0.040         | <b>0.027</b>   | 0.261         | 0.030 | 0.106          | 0.229                | 0.020 | <b>0.029</b>   | 0.303              | 0.017 |
| 0.189         | 0.729          | 2.321         | 0.136 | 0.271          | 2.250                | 0.156 | 0.420          | 2.402              | 0.175 |
| 0.162         | 0.654          | 1.666         | 0.256 | 0.594          | 1.632                | 0.242 | 0.567          | 1.413              | 0.094 |
| 0.664         | <b>0.000</b>   | 1.477         | 0.156 | 0.239          | 8.944                | 0.669 | <b>0.000</b>   | 9.992              | 0.689 |
| 0.180         | 0.101          | 2.257         | 0.198 | 0.325          | 1.778                | 0.131 | 0.454          | 1.921              | 0.142 |
| 0.016         | <b>0.004</b>   | 0.154         | 0.013 | <b>0.037</b>   | 0.185                | 0.013 | <b>0.001</b>   | 0.183              | 0.018 |
| 0.339         | 0.557          | 4.412         | 0.292 | 0.299          | 4.394                | 0.270 | 0.253          | 4.526              | 0.282 |
| 0.011         | 0.500          | 0.116         | 0.013 | 0.156          | 0.102                | 0.006 | 0.491          | 0.109              | 0.007 |
| 0.245         | 0.227          | 2.352         | 0.283 | 0.097          | 1.773                | 0.224 | 0.786          | 2.046              | 0.261 |
| 0.103         | 0.373          | 1.068         | 0.150 | 0.143          | 0.851                | 0.101 | 0.509          | 1.063              | 0.139 |
| 0.066         | 0.338          | 1.415         | 0.069 | 0.616          | 1.259                | 0.067 | 0.347          | 1.359              | 0.070 |
| 0.139         | 0.750          | 1.414         | 0.084 | 0.312          | 1.523                | 0.088 | 0.085          | 1.839              | 0.135 |
| 0.428         | <b>0.000</b>   | 4.473         | 0.240 | 0.106          | 6.250                | 0.424 | <b>0.000</b>   | 6.551              | 0.341 |

| <i>ela1-2</i> |                | <i>ela2-1</i> |       |                | <i>ela1-1;ela2-1</i> |       |                | <i>ela1-2;ela2</i> |       |
|---------------|----------------|---------------|-------|----------------|----------------------|-------|----------------|--------------------|-------|
| SE            | <i>t</i> -test | Mean          | SE    | <i>t</i> -test | Mean                 | SE    | <i>t</i> -test | Mean               | SE    |
| 0.100         | <b>0.000</b>   | 3.310         | 0.283 | 0.712          | 1.277                | 0.164 | <b>0.000</b>   | 1.236              | 0.142 |
| 0.478         | 0.420          | 4.286         | 0.261 | 0.774          | 4.568                | 0.185 | 0.372          | 4.217              | 0.153 |
| 0.796         | 0.173          | 4.489         | 0.393 | 0.558          | 4.669                | 0.277 | 0.279          | 4.399              | 0.380 |
| 0.158         | <b>0.002</b>   | 0.885         | 0.073 | 0.538          | 1.709                | 0.077 | <b>0.000</b>   | 1.443              | 0.099 |
| 0.165         | 0.888          | 1.766         | 0.245 | 0.384          | 1.367                | 0.067 | 0.209          | 1.256              | 0.096 |
| 0.874         | 0.362          | 9.361         | 0.691 | 0.700          | 8.618                | 0.515 | 0.517          | 7.467              | 0.557 |
| 0.086         | 0.331          | 0.472         | 0.048 | 0.101          | 0.233                | 0.033 | <b>0.045</b>   | 0.325              | 0.062 |
| 0.294         | 0.128          | 2.606         | 0.160 | 0.241          | 2.630                | 0.124 | 0.128          | 2.434              | 0.059 |
| 0.814         | <b>0.015</b>   | 0.979         | 0.084 | 0.491          | 1.761                | 0.201 | <b>0.007</b>   | 1.600              | 0.141 |
| 1.252         | <b>0.000</b>   | 1.067         | 0.084 | <b>0.046</b>   | 10.571               | 0.373 | <b>0.000</b>   | 10.432             | 0.272 |
| 0.101         | <b>0.000</b>   | 2.366         | 0.136 | 0.052          | 1.600                | 0.110 | 0.084          | 1.241              | 0.079 |
| 0.075         | <b>0.014</b>   | 0.165         | 0.016 | 0.374          | 0.245                | 0.017 | <b>0.000</b>   | 0.234              | 0.018 |
| 0.605         | 0.100          | 4.460         | 0.216 | 0.584          | 4.742                | 0.161 | 0.113          | 4.636              | 0.120 |
| 0.015         | 0.270          | 0.096         | 0.009 | 0.803          | 0.154                | 0.014 | <b>0.003</b>   | 0.112              | 0.010 |
| 0.377         | 0.870          | 2.580         | 0.287 | 0.082          | 1.791                | 0.115 | 0.313          | 1.377              | 0.157 |
| 0.317         | 0.140          | 0.816         | 0.123 | 0.083          | 0.825                | 0.081 | <b>0.014</b>   | 0.685              | 0.074 |

|       |              |       |       |              |       |       |              |       |       |
|-------|--------------|-------|-------|--------------|-------|-------|--------------|-------|-------|
| 0.343 | <b>0.037</b> | 1.875 | 0.179 | 0.111        | 1.758 | 0.116 | 0.136        | 1.805 | 0.112 |
| 0.303 | 0.973        | 2.145 | 0.230 | <b>0.023</b> | 1.626 | 0.131 | 0.398        | 1.372 | 0.162 |
| 0.492 | <b>0.000</b> | 3.970 | 0.266 | 0.128        | 6.954 | 0.164 | <b>0.000</b> | 6.543 | 0.199 |

---

| <i>-I</i>    | <i>e1b2-1</i>  |       |       | <i>ivd1-2</i>  |       |              | <i>mcca1-1</i> |       |       |
|--------------|----------------|-------|-------|----------------|-------|--------------|----------------|-------|-------|
|              | <i>t</i> -test | Mean  | SE    | <i>t</i> -test | Mean  | SE           | <i>t</i> -test | Mean  | SE    |
| 0.099        | 1.253          | 0.088 | 0.352 | 1.581          | 0.137 | 0.210        | 1.308          | 0.070 | 0.584 |
| <b>0.021</b> | 0.047          | 0.005 | 0.078 | 0.046          | 0.008 | 0.182        | 0.046          | 0.008 | 0.172 |
| 0.679        | 0.100          | 0.011 | 0.116 | 0.131          | 0.011 | 0.594        | 0.121          | 0.008 | 0.843 |
| 0.682        | 1.336          | 0.136 | 0.376 | 1.656          | 0.150 | 0.674        | 1.582          | 0.160 | 0.904 |
| 0.098        | 0.832          | 0.075 | 0.629 | 1.050          | 0.072 | 0.071        | 0.929          | 0.040 | 0.453 |
| 0.645        | 5.767          | 0.372 | 0.382 | 6.869          | 0.258 | 0.115        | 5.732          | 0.203 | 0.224 |
| 0.087        | 0.243          | 0.041 | 0.600 | 0.237          | 0.033 | 0.485        | 0.188          | 0.026 | 0.067 |
| <b>0.003</b> | 0.088          | 0.004 | 0.097 | 0.110          | 0.008 | <b>0.003</b> | 0.094          | 0.008 | 0.088 |
| 0.810        | 0.038          | 0.003 | 0.484 | 0.055          | 0.006 | 0.074        | 0.037          | 0.003 | 0.323 |
| <b>0.016</b> | 0.077          | 0.006 | 0.461 | 0.117          | 0.018 | <b>0.033</b> | 0.086          | 0.016 | 0.382 |
| 0.148        | 0.109          | 0.008 | 0.786 | 0.133          | 0.008 | <b>0.021</b> | 0.109          | 0.008 | 0.800 |
| 0.202        | 0.024          | 0.002 | 0.883 | 0.028          | 0.002 | 0.130        | 0.027          | 0.003 | 0.330 |
| 0.426        | 0.119          | 0.007 | 0.722 | 0.138          | 0.006 | <b>0.043</b> | 0.123          | 0.005 | 0.861 |
| 0.249        | 0.183          | 0.013 | 0.436 | 0.214          | 0.009 | <b>0.013</b> | 0.179          | 0.016 | 0.615 |
| <b>0.018</b> | 0.354          | 0.037 | 0.189 | 0.543          | 0.055 | <b>0.046</b> | 0.376          | 0.032 | 0.346 |
| 0.137        | 0.370          | 0.037 | 0.952 | 0.495          | 0.070 | 0.126        | 0.364          | 0.048 | 0.967 |
| <b>0.030</b> | 0.024          | 0.001 | 0.096 | 0.030          | 0.003 | <b>0.018</b> | 0.022          | 0.003 | 0.783 |
| 0.207        | 0.025          | 0.001 | 0.111 | 0.040          | 0.006 | 0.103        | 0.029          | 0.002 | 0.959 |
| <b>0.016</b> | 0.160          | 0.006 | 0.658 | 0.215          | 0.021 | <b>0.022</b> | 0.175          | 0.015 | 0.258 |

| <i>-I</i>    | <i>e1b2-1</i>  |       |              | <i>ivd1-2</i>  |       |              | <i>mcca1-1</i> |       |              |
|--------------|----------------|-------|--------------|----------------|-------|--------------|----------------|-------|--------------|
|              | <i>t</i> -test | Mean  | SE           | <i>t</i> -test | Mean  | SE           | <i>t</i> -test | Mean  | SE           |
| 0.318        | 2.603          | 0.155 | 0.554        | 0.881          | 0.067 | <b>0.000</b> | 3.071          | 0.286 | 0.082        |
| 0.423        | 2.303          | 0.157 | 0.514        | 2.509          | 0.209 | 0.563        | 2.579          | 0.237 | 0.440        |
| <b>0.021</b> | 1.364          | 0.125 | 0.468        | 2.177          | 0.179 | <b>0.001</b> | 1.735          | 0.149 | <b>0.041</b> |
| <b>0.000</b> | 0.731          | 0.053 | 0.066        | 1.754          | 0.177 | <b>0.000</b> | 1.484          | 0.169 | <b>0.000</b> |
| 0.053        | 0.774          | 0.068 | 0.543        | 0.725          | 0.047 | 0.364        | 0.757          | 0.065 | 0.761        |
| 0.304        | 6.780          | 0.335 | 0.460        | 5.153          | 0.269 | <b>0.010</b> | 5.560          | 0.312 | 0.056        |
| 0.977        | 0.256          | 0.039 | 0.486        | 0.156          | 0.024 | <b>0.012</b> | 0.249          | 0.033 | 0.390        |
| 0.377        | 1.330          | 0.057 | 0.680        | 1.479          | 0.123 | 0.700        | 1.518          | 0.137 | 0.552        |
| 0.205        | 1.291          | 0.136 | 0.930        | 1.768          | 0.178 | 0.195        | 2.476          | 0.284 | <b>0.007</b> |
| <b>0.000</b> | 1.892          | 0.123 | <b>0.001</b> | 2.721          | 0.110 | <b>0.000</b> | 5.710          | 0.389 | <b>0.000</b> |
| <b>0.007</b> | 1.233          | 0.100 | 0.719        | 1.625          | 0.145 | 0.117        | 1.256          | 0.127 | 0.561        |
| <b>0.001</b> | 0.069          | 0.005 | 0.561        | 0.071          | 0.004 | 0.963        | 0.102          | 0.010 | <b>0.015</b> |
| 0.096        | 2.548          | 0.120 | 0.638        | 2.727          | 0.186 | 0.852        | 2.833          | 0.184 | 0.512        |
| <b>0.006</b> | 0.179          | 0.018 | 0.677        | 0.185          | 0.009 | 0.261        | 0.186          | 0.018 | 0.341        |



|              |       |       |       |       |       |              |       |       |              |
|--------------|-------|-------|-------|-------|-------|--------------|-------|-------|--------------|
| <b>0.002</b> | 0.929 | 0.088 | 0.356 | 1.456 | 0.206 | <b>0.030</b> | 1.332 | 0.170 | <b>0.042</b> |
| <b>0.015</b> | 0.794 | 0.108 | 0.710 | 0.860 | 0.084 | 0.781        | 0.831 | 0.077 | 0.947        |
| 0.919        | 0.770 | 0.031 | 0.843 | 0.821 | 0.032 | 0.748        | 0.810 | 0.027 | 0.533        |
| 0.139        | 0.934 | 0.076 | 0.907 | 1.130 | 0.081 | 0.199        | 1.009 | 0.074 | 0.890        |
| <b>0.000</b> | 3.416 | 0.132 | 0.136 | 3.925 | 0.205 | <b>0.011</b> | 4.258 | 0.306 | <b>0.008</b> |

| <i>-I</i>      | <i>eIb2-1</i> |       |                | <i>ivd1-2</i> |       |                | <i>mcca1-1</i> |       |                |
|----------------|---------------|-------|----------------|---------------|-------|----------------|----------------|-------|----------------|
| <i>t</i> -test | Mean          | SE    | <i>t</i> -test | Mean          | SE    | <i>t</i> -test | Mean           | SE    | <i>t</i> -test |
| <b>0.001</b>   | 2.361         | 0.147 | 0.580          | 3.489         | 0.581 | <b>0.012</b>   | 1.357          | 0.133 | <b>0.001</b>   |
| <b>0.015</b>   | 3.764         | 0.089 | 0.907          | 5.723         | 0.525 | <b>0.003</b>   | 4.003          | 0.163 | 0.399          |
| <b>0.011</b>   | 2.448         | 0.189 | 0.248          | 4.998         | 0.589 | <b>0.006</b>   | 3.130          | 0.140 | 0.127          |
| <b>0.000</b>   | 1.014         | 0.041 | 0.559          | 2.209         | 0.265 | <b>0.001</b>   | 1.729          | 0.135 | <b>0.000</b>   |
| 0.168          | 0.748         | 0.045 | <b>0.018</b>   | 1.016         | 0.178 | 0.911          | 0.681          | 0.041 | <b>0.008</b>   |
| 0.730          | 6.648         | 0.328 | 0.100          | 5.668         | 1.098 | 0.181          | 5.015          | 0.337 | <b>0.002</b>   |
| 0.348          | 0.183         | 0.026 | <b>0.005</b>   | 0.425         | 0.104 | 0.379          | 0.299          | 0.032 | 0.255          |
| 0.102          | 1.878         | 0.067 | 0.112          | 5.400         | 1.039 | <b>0.011</b>   | 2.161          | 0.067 | 0.868          |
| 0.518          | 1.637         | 0.214 | 0.833          | 1.553         | 0.295 | 0.959          | 2.995          | 0.420 | <b>0.007</b>   |
| <b>0.000</b>   | 1.782         | 0.077 | <b>0.003</b>   | 3.917         | 0.808 | <b>0.014</b>   | 8.198          | 0.328 | <b>0.000</b>   |
| 0.953          | 1.649         | 0.087 | 0.088          | 1.957         | 0.304 | 0.822          | 1.238          | 0.073 | <b>0.003</b>   |
| <b>0.008</b>   | 0.104         | 0.006 | 0.192          | 0.704         | 0.188 | <b>0.013</b>   | 0.179          | 0.013 | <b>0.003</b>   |
| 0.135          | 3.774         | 0.153 | 0.292          | 10.098        | 1.931 | <b>0.012</b>   | 4.349          | 0.182 | 0.336          |
| 0.193          | 0.091         | 0.005 | 0.698          | 0.633         | 0.165 | <b>0.010</b>   | 0.073          | 0.006 | 0.156          |
| 0.298          | 1.254         | 0.113 | 0.051          | 3.666         | 0.706 | <b>0.016</b>   | 1.644          | 0.160 | 0.801          |
| 0.140          | 0.573         | 0.073 | 0.265          | 1.128         | 0.205 | 0.118          | 0.498          | 0.081 | 0.129          |
| 0.867          | 1.198         | 0.057 | 0.187          | 3.221         | 0.616 | <b>0.016</b>   | 1.376          | 0.082 | 0.804          |
| <b>0.001</b>   | 1.291         | 0.062 | 0.573          | 2.931         | 0.506 | <b>0.004</b>   | 1.209          | 0.100 | 0.902          |
| <b>0.000</b>   | 4.046         | 0.213 | 0.609          | 9.901         | 1.862 | <b>0.010</b>   | 5.923          | 0.241 | <b>0.000</b>   |

| <i>-I</i>      | <i>eIb2-1</i> |       |                | <i>ivd1-2</i> |       |                | <i>mcca1-1</i> |       |                |
|----------------|---------------|-------|----------------|---------------|-------|----------------|----------------|-------|----------------|
| <i>t</i> -test | Mean          | SE    | <i>t</i> -test | Mean          | SE    | <i>t</i> -test | Mean           | SE    | <i>t</i> -test |
| <b>0.000</b>   | 2.936         | 0.247 | 0.503          | 10.334        | 2.264 | <b>0.011</b>   | 0.798          | 0.109 | <b>0.000</b>   |
| 0.869          | 3.726         | 0.314 | 0.441          | 8.915         | 0.943 | <b>0.001</b>   | 4.747          | 0.221 | 0.225          |
| 0.671          | 3.761         | 0.332 | 0.392          | 12.034        | 1.219 | <b>0.000</b>   | 5.142          | 0.479 | 0.121          |
| <b>0.000</b>   | 0.849         | 0.068 | 0.833          | 3.914         | 0.548 | <b>0.000</b>   | 1.582          | 0.110 | <b>0.000</b>   |
| 0.069          | 1.430         | 0.160 | 0.619          | 1.910         | 0.151 | 0.051          | 1.102          | 0.081 | <b>0.004</b>   |
| <b>0.034</b>   | 9.769         | 0.716 | 0.394          | 11.304        | 1.458 | 0.165          | 5.917          | 0.382 | <b>0.000</b>   |
| 0.688          | 0.434         | 0.067 | 0.357          | 1.679         | 0.543 | <b>0.038</b>   | 0.361          | 0.071 | 0.955          |
| 0.626          | 2.270         | 0.158 | 0.571          | 14.187        | 1.465 | <b>0.000</b>   | 2.881          | 0.100 | <b>0.002</b>   |
| <b>0.006</b>   | 1.461         | 0.153 | <b>0.032</b>   | 2.594         | 0.481 | <b>0.013</b>   | 3.128          | 0.586 | <b>0.006</b>   |
| <b>0.000</b>   | 1.063         | 0.076 | <b>0.037</b>   | 9.303         | 1.335 | <b>0.000</b>   | 10.612         | 0.319 | <b>0.000</b>   |
| <b>0.001</b>   | 1.711         | 0.183 | 0.340          | 3.751         | 0.642 | <b>0.021</b>   | 0.871          | 0.073 | <b>0.000</b>   |
| <b>0.001</b>   | 0.135         | 0.012 | 0.512          | 1.929         | 0.281 | <b>0.000</b>   | 0.297          | 0.022 | <b>0.000</b>   |
| 0.183          | 4.079         | 0.264 | 0.545          | 26.226        | 2.542 | <b>0.000</b>   | 5.329          | 0.248 | <b>0.006</b>   |
| 0.160          | 0.094         | 0.013 | 0.910          | 2.129         | 0.350 | <b>0.000</b>   | 0.111          | 0.006 | 0.115          |
| <b>0.010</b>   | 1.789         | 0.225 | 0.485          | 11.198        | 1.480 | <b>0.000</b>   | 1.535          | 0.135 | <b>0.035</b>   |
| 0.189          | 0.581         | 0.072 | 0.878          | 3.217         | 0.562 | <b>0.001</b>   | 0.547          | 0.058 | 0.763          |

|              |       |       |       |        |       |              |       |       |              |
|--------------|-------|-------|-------|--------|-------|--------------|-------|-------|--------------|
| 0.068        | 1.560 | 0.082 | 0.873 | 10.017 | 1.150 | <i>0.000</i> | 1.911 | 0.101 | <i>0.009</i> |
| 0.706        | 1.076 | 0.105 | 0.051 | 7.680  | 1.272 | <i>0.001</i> | 1.167 | 0.146 | 0.179        |
| <i>0.000</i> | 3.481 | 0.231 | 0.999 | 24.924 | 3.016 | <i>0.000</i> | 7.505 | 0.274 | <i>0.000</i> |

| <i>mccb1-1</i> |       |                | <i>hml1-2</i> |       |                |
|----------------|-------|----------------|---------------|-------|----------------|
| Mean           | SE    | <i>t</i> -test | Mean          | SE    | <i>t</i> -test |
| 1.396          | 0.102 | 0.851          | 1.475         | 0.089 | 0.409          |
| 0.043          | 0.005 | 0.154          | 0.073         | 0.008 | <b>0.001</b>   |
| 0.153          | 0.013 | 0.095          | 0.116         | 0.009 | 0.569          |
| 1.655          | 0.185 | 0.702          | 1.458         | 0.107 | 0.679          |
| 1.164          | 0.083 | <b>0.011</b>   | 0.834         | 0.074 | 0.639          |
| 6.678          | 0.290 | 0.275          | 5.201         | 0.295 | <b>0.032</b>   |
| 0.224          | 0.035 | 0.345          | 0.187         | 0.029 | 0.076          |
| 0.114          | 0.006 | <b>0.000</b>   | 0.096         | 0.008 | 0.076          |
| 0.035          | 0.005 | 0.299          | 0.042         | 0.010 | 0.962          |
| 0.083          | 0.010 | 0.320          | 0.116         | 0.017 | <b>0.031</b>   |
| 0.120          | 0.012 | 0.315          | 0.128         | 0.010 | 0.100          |
| 0.031          | 0.003 | <b>0.017</b>   | 0.029         | 0.005 | 0.329          |
| 0.129          | 0.008 | 0.450          | 0.131         | 0.008 | 0.330          |
| 0.231          | 0.015 | <b>0.007</b>   | 0.176         | 0.012 | 0.649          |
| 0.420          | 0.030 | 0.847          | 0.447         | 0.031 | 0.368          |
| 0.365          | 0.041 | 0.973          | 0.357         | 0.031 | 0.830          |
| 0.025          | 0.001 | <b>0.012</b>   | 0.027         | 0.002 | <b>0.034</b>   |
| 0.028          | 0.002 | 0.495          | 0.037         | 0.005 | 0.171          |
| 0.182          | 0.013 | 0.091          | 0.200         | 0.019 | 0.051          |

| <i>mccb1-1</i> |       |                | <i>hml1-2</i> |       |                |
|----------------|-------|----------------|---------------|-------|----------------|
| Mean           | SE    | <i>t</i> -test | Mean          | SE    | <i>t</i> -test |
| 3.054          | 0.266 | 0.073          | 2.654         | 0.166 | 0.412          |
| 2.727          | 0.151 | 0.090          | 2.545         | 0.132 | 0.346          |
| 1.695          | 0.083 | <b>0.006</b>   | 1.314         | 0.095 | 0.657          |
| 1.395          | 0.130 | <b>0.000</b>   | 1.376         | 0.078 | <b>0.000</b>   |
| 0.755          | 0.049 | 0.689          | 0.594         | 0.067 | <b>0.027</b>   |
| 5.492          | 0.207 | <b>0.031</b>   | 4.625         | 0.219 | <b>0.001</b>   |
| 0.228          | 0.031 | 0.209          | 0.186         | 0.029 | <b>0.047</b>   |
| 1.504          | 0.091 | 0.497          | 1.383         | 0.070 | 0.693          |
| 2.024          | 0.300 | 0.112          | 2.027         | 0.256 | 0.074          |
| 5.827          | 0.321 | <b>0.000</b>   | 5.308         | 0.234 | <b>0.000</b>   |
| 1.333          | 0.094 | 0.916          | 1.093         | 0.092 | 0.056          |
| 0.104          | 0.006 | <b>0.000</b>   | 0.091         | 0.004 | <b>0.011</b>   |
| 2.888          | 0.131 | 0.270          | 2.622         | 0.105 | 0.701          |
| 0.198          | 0.022 | 0.230          | 0.140         | 0.009 | 0.243          |

|       |       |              |       |       |              |
|-------|-------|--------------|-------|-------|--------------|
| 1.259 | 0.087 | <b>0.007</b> | 1.123 | 0.098 | 0.101        |
| 0.824 | 0.055 | 0.992        | 0.841 | 0.137 | 0.913        |
| 0.870 | 0.039 | 0.499        | 0.849 | 0.052 | 0.823        |
| 1.139 | 0.070 | 0.137        | 0.963 | 0.127 | 0.815        |
| 4.066 | 0.245 | <b>0.008</b> | 3.745 | 0.139 | <b>0.016</b> |

| <i>mccb1-1</i> |       |                | <i>hml1-2</i> |       |                |
|----------------|-------|----------------|---------------|-------|----------------|
| Mean           | SE    | <i>t</i> -test | Mean          | SE    | <i>t</i> -test |
| 1.618          | 0.099 | <b>0.005</b>   | 1.301         | 0.087 | <b>0.001</b>   |
| 4.681          | 0.337 | <b>0.032</b>   | 3.852         | 0.195 | 0.848          |
| 3.355          | 0.229 | <b>0.027</b>   | 2.379         | 0.221 | 0.174          |
| 1.819          | 0.095 | <b>0.000</b>   | 1.694         | 0.078 | <b>0.000</b>   |
| 0.855          | 0.066 | 0.165          | 0.469         | 0.035 | <b>0.000</b>   |
| 5.715          | 0.461 | <b>0.014</b>   | 4.214         | 0.177 | <b>0.000</b>   |
| 0.270          | 0.040 | 0.126          | 0.137         | 0.034 | <b>0.002</b>   |
| 2.353          | 0.131 | 0.213          | 1.902         | 0.094 | 0.161          |
| 2.669          | 0.399 | <b>0.048</b>   | 1.683         | 0.148 | 0.614          |
| 9.063          | 0.543 | <b>0.000</b>   | 7.511         | 0.324 | <b>0.000</b>   |
| 1.591          | 0.095 | 0.093          | 1.194         | 0.084 | <b>0.001</b>   |
| 0.190          | 0.015 | <b>0.001</b>   | 0.153         | 0.006 | <b>0.008</b>   |
| 4.586          | 0.265 | 0.117          | 3.892         | 0.156 | 0.464          |
| 0.081          | 0.004 | 0.302          | 0.066         | 0.005 | <b>0.047</b>   |
| 1.915          | 0.215 | 0.542          | 1.321         | 0.089 | 0.089          |
| 0.720          | 0.129 | 0.904          | 0.367         | 0.034 | <b>0.026</b>   |
| 1.432          | 0.088 | 0.635          | 1.367         | 0.069 | 0.820          |
| 1.569          | 0.160 | 0.086          | 1.472         | 0.112 | 0.190          |
| 6.659          | 0.352 | <b>0.000</b>   | 5.433         | 0.251 | <b>0.001</b>   |

| <i>mccb1-1</i> |       |                | <i>hml1-2</i> |       |                |
|----------------|-------|----------------|---------------|-------|----------------|
| Mean           | SE    | <i>t</i> -test | Mean          | SE    | <i>t</i> -test |
| 1.044          | 0.067 | <b>0.000</b>   | 0.752         | 0.098 | <b>0.000</b>   |
| 5.025          | 0.172 | 0.076          | 5.634         | 0.557 | <b>0.049</b>   |
| 5.045          | 0.304 | 0.075          | 4.647         | 0.342 | 0.346          |
| 1.755          | 0.090 | <b>0.000</b>   | 1.695         | 0.287 | <b>0.015</b>   |
| 1.221          | 0.069 | <b>0.024</b>   | 1.390         | 0.224 | 0.590          |
| 7.496          | 0.465 | <b>0.021</b>   | 6.751         | 0.693 | <b>0.015</b>   |
| 0.295          | 0.047 | 0.366          | 0.217         | 0.037 | <b>0.032</b>   |
| 2.820          | 0.127 | <b>0.013</b>   | 3.607         | 0.669 | 0.105          |
| 2.389          | 0.475 | <b>0.021</b>   | 2.929         | 0.616 | <b>0.016</b>   |
| 10.061         | 0.265 | <b>0.000</b>   | 10.667        | 0.590 | <b>0.000</b>   |
| 1.251          | 0.054 | <b>0.001</b>   | 1.305         | 0.145 | <b>0.007</b>   |
| 0.277          | 0.012 | <b>0.000</b>   | 0.333         | 0.040 | <b>0.002</b>   |
| 5.130          | 0.132 | <b>0.005</b>   | 5.355         | 0.357 | <b>0.025</b>   |
| 0.113          | 0.009 | 0.124          | 0.118         | 0.013 | 0.142          |
| 2.017          | 0.165 | 0.862          | 1.985         | 0.270 | 0.984          |
| 0.666          | 0.089 | 0.339          | 0.788         | 0.142 | 0.171          |

|       |       |              |       |       |              |
|-------|-------|--------------|-------|-------|--------------|
| 1.947 | 0.102 | <b>0.005</b> | 2.593 | 0.417 | <b>0.037</b> |
| 2.022 | 0.311 | 0.124        | 2.035 | 0.235 | 0.056        |
| 7.891 | 0.350 | <b>0.000</b> | 9.091 | 1.480 | <b>0.005</b> |

---

**Supplemental Table S4.** *Leaf amino acid profiles of ivd1-2 relative to Col-0 at 6d and 9*

| Amino acid | 6d in dark |       |                | Mean   |
|------------|------------|-------|----------------|--------|
|            | Mean       | SE    | <i>t</i> -test |        |
| Ala        | 1.375      | 0.229 | 0.012          | 3.259  |
| Arg        | 1.548      | 0.142 | 0.003          | 2.153  |
| Asn        | 1.862      | 0.219 | 0.006          | 2.880  |
| Asp        | 2.274      | 0.273 | 0.001          | 4.704  |
| Gln        | 0.962      | 0.169 | 0.911          | 1.252  |
| Glu        | 0.713      | 0.138 | 0.181          | 1.249  |
| Gly        | 1.202      | 0.294 | 0.379          | 4.712  |
| His        | 2.520      | 0.485 | 0.011          | 5.967  |
| Ile        | 0.989      | 0.188 | 0.959          | 2.456  |
| Leu        | 3.114      | 0.642 | 0.014          | 11.103 |
| Lys        | 0.969      | 0.150 | 0.822          | 1.930  |
| Met        | 5.922      | 1.583 | 0.013          | 13.169 |
| Phe        | 2.454      | 0.469 | 0.012          | 6.114  |
| Pro        | 6.796      | 1.768 | 0.010          | 23.072 |
| Ser        | 2.092      | 0.403 | 0.016          | 5.657  |
| Thr        | 1.457      | 0.265 | 0.118          | 5.659  |
| Trp        | 2.415      | 0.462 | 0.016          | 6.494  |
| Tyr        | 2.417      | 0.417 | 0.004          | 5.275  |
| Val        | 2.565      | 0.482 | 0.010          | 7.159  |

The mean represents the fold change between the averages of five biological replicates of time point.

*d in prolonged darkness*

---

| <b>9d in dark</b> |               |
|-------------------|---------------|
| <b>SE</b>         | <b>t-test</b> |
| 0.714             | 0.011         |
| 0.228             | 0.001         |
| 0.292             | 0.000         |
| 0.659             | 0.000         |
| 0.099             | 0.051         |
| 0.161             | 0.165         |
| 1.524             | 0.038         |
| 0.616             | 0.000         |
| 0.455             | 0.013         |
| 1.593             | 0.000         |
| 0.330             | 0.021         |
| 1.916             | 0.000         |
| 0.593             | 0.000         |
| 3.794             | 0.000         |
| 0.748             | 0.000         |
| 0.988             | 0.001         |
| 0.746             | 0.000         |
| 0.873             | 0.001         |
| 0.866             | 0.000         |

---

*f ivdI-2 and Col-0 at the same*

**Supplemental Table S5. Primers for genotyping, qPCR and amiRNA generation**

| <b>Primer</b>     | <b>Sequence</b>                           |
|-------------------|-------------------------------------------|
| LP_SALK_138630    | TGAACCTGTATGTGGAGGAGG                     |
| RP_SALK_138630    | TTCAAAAGCTTTTGATGGGTG                     |
| LP_SALK_037854    | CAAATTCAACGATTTGCCAAG                     |
| RP_SALK_037854    | TTTTACCCAACGTTTGTTC                       |
| LP_SALK_071680C   | ACCTTTACCATGACTTGTGCG                     |
| RP_SALK_071680C   | AGTTGGAGATGGATACGGATG                     |
| LP_SALK_098054    | GATGTTGGATTTGGTGGTGTG                     |
| RP_SALK_098054    | TGGAACCTATATACCTCTGCCTC                   |
| LP_SALK_027039    | TTGTTCTCGTTGCATATGCTG                     |
| RP_SALK_027039    | CATCTTCTTCGGCTTTGTGAG                     |
| LP_SALK_137966    | AATATCTTGCTCATGGCCATG                     |
| RP_SALK_137966    | TGCAGCCTTTCTTAATGCTTC                     |
| LP_SALK_117349    | CATATTTT TAGCAGGACCGCC                    |
| RP_SALK_117349    | AGCACAGGATACTGCCATCAC                     |
| LP_SALK_145226    | TTCTTTGCACCTGCAGATAC                      |
| RP_SALK_145226    | GAAGTTGGTCCAAGAGATGGC                     |
| LBa1              | TGGTTCACGTAGTGGGCCATCG                    |
| P1_At1g21400      | GGTTTGCTAGATCCAAAACCC                     |
| P2_At1g21400      | AGAACCCGGTAACATGGAATC                     |
| p745              | AACGTCCGCAATGTGTTATTAAGTTGTC              |
| LP_SAIL_113_D07   | TTTTTACAGACGAAGGCCTTG                     |
| RP_SAIL_113_D07   | CTCTTCACCGATTGCAGTAGC                     |
| LB3               | TAGCATCTGAATTT CATAACCAATCTCGATACAC       |
| GABI_756G02-LP    | LPAATCTGCAAAGCAACCACAAC                   |
| GABI_756G02-RP    | RPACCTGCAGAGGAATATGGAGG                   |
| LB-GABI-KAT-o8409 | ATATTGACCATCATACTCATTGC                   |
| AT1G21400L3       | CGTATTTGAGTCCCTTCGGTA                     |
| AT1G21400R3       | TTTCATCTCCGATGTGTAACC                     |
| AT5G09300L2       | CACGAATACGCCAACAATCA                      |
| AT5G09300R2       | TCATCAAGAACACGGTAGCA                      |
| At3g13450L        | AGGTTCCGACATAACTCTTG                      |
| At3g13450R        | CACTGAGGTCTCAACGATTT                      |
| LPD2_At3g17240L   | CTCGGTGGTACTTGTCTTAA                      |
| LPD2_At3g17240R   | CAACCGAAGAGACCTTAACA                      |
| amiRNA A cacc     | CACCCTGCAAGGCGATTAAGTTGGGTAAC             |
| amiRNA B          | GCGGATAACAATTT CACACAGGAAACAG             |
| amiE1B1-1 I       | gaTATGCGATTACATTAGTCCTTtctctctttgtattcc   |
| amiE1B1-1 II      | gaAAGGACTAATGTAATCGCATAtcaaagagaatcaatga  |
| amiE1B1-1 III     | gaAAAGACTAATGTATTTCGCATTtcacaggtcgtgatatg |
| amiE1B1-1 IV      | gaAATGCGAATACATTAGTCTTTtctacatatattcct    |
| amiE1B1-2 I       | gaTAACTACAGATAGTACGCCTAtctctctttgtattcc   |
| amiE1B1-2 II      | gaTAGGCGTACTATCTGTAGTTAtcaaagagaatcaatga  |
| amiE1B1-2 III     | gaTAAGCGTACTATCAGTAGTTTtcacaggtcgtgatatg  |
| amiE1B1-2 IV      | gaAAACTACTGATAGTACGCTTAtctacatatattcct    |
| pEARLEY-100 For   | CATCGTGGAAAAAGAAGACGT                     |
| pEARLEY-100 Rev   | AGGATCTGAGCTACACATGCT                     |



|                                                                               |
|-------------------------------------------------------------------------------|
| <b>Note</b>                                                                   |
| Genotyping primer for <i>bcat1-1</i>                                          |
| Genotyping primer for <i>bcat1-1</i>                                          |
| Genotyping primer for <i>bcat2-1</i>                                          |
| Genotyping primer for <i>bcat2-1</i>                                          |
| Genotyping primer for <i>e1a1-1</i>                                           |
| Genotyping primer for <i>e1a1-1</i>                                           |
| Genotyping primer for <i>e1b2-1</i>                                           |
| Genotyping primer for <i>e1b2-1</i>                                           |
| Genotyping primer for <i>mtlpd2-2</i>                                         |
| Genotyping primer for <i>mtlpd2-2</i>                                         |
| Genotyping primer for <i>mcca1-1</i>                                          |
| Genotyping primer for <i>mcca1-1</i>                                          |
| Genotyping primer for <i>mccb1-1</i>                                          |
| Genotyping primer for <i>mccb1-1</i>                                          |
| Genotyping primer for <i>hml1-2</i>                                           |
| Genotyping primer for <i>hml1-2</i>                                           |
| Universal left genotyping primer for SALK lines                               |
| Genotyping primer for <i>e1a1-2</i>                                           |
| Genotyping primer for <i>e1a1-2</i>                                           |
| Universal left genotyping primer for WiscDsLox lines                          |
| Genotyping primer for <i>e1a2-1</i>                                           |
| Genotyping primer for <i>e1a2-1</i>                                           |
| Universal left genotyping primer for SAIL lines                               |
| Genotyping primer for <i>ivd1-2</i>                                           |
| Genotyping primer for <i>ivd1-2</i>                                           |
| Insertion specific genotyping left primer for <i>ivd1-2</i>                   |
| qPCR primer for <i>EIA1</i>                                                   |
| qPCR primer for <i>EIA1</i>                                                   |
| qPCR primer for <i>EIA2</i>                                                   |
| qPCR primer for <i>EIA2</i>                                                   |
| qPCR primer for <i>E1B2</i>                                                   |
| qPCR primer for <i>E1B2</i>                                                   |
| qPCR primer for <i>mtLPD2</i>                                                 |
| qPCR primer for <i>mtLPD2</i>                                                 |
| amiRNA a primer with cacc at 5', for amiRNA inserts cloning into pENTR-d/topo |
| amiRNA B, for amiRNA inserts cloning into pENTR-d/topo                        |
| I miR-s primer designed for amiE1B1-1                                         |
| II miR-a primer designed for amiE1B1-1                                        |
| III miR*s primer designed for amiE1B1-1                                       |
| IV miR*a primer designed for amiE1B1-1                                        |
| I miR-s primer designed for amiE1B1-2                                         |
| II miR-a primer designed for amiE1B1-2                                        |
| III miR*s primer designed for amiE1B1-2                                       |
| IV miR*a primer designed for amiE1B1-2                                        |
| Forward primer for amplifying/genotyping insert on pEarleyGate100 vector      |
| Reverse primer for amplifying/genotyping insert on pEarleyGate100 vector      |

1 **Supplemental Material**

2

3 **Supplemental Figure S1.** Graphical representation of transcript correlation modules  
4 among the four datasets.

5 Graphs were constructed using development (top left), stress (top right), diurnal/circadian  
6 (bottom left), and light (bottom right) datasets. Nodes represent transcripts and edges  
7 indicate pairwise PCC values exceeding the threshold in each database. Transcript names  
8 of validated genes are in bold, and proposed genes in regular font. The size of nodes  
9 corresponds to the connectivity of the transcript (smaller node indicates fewer significant  
10 correlations with other transcripts, and *vice versa*). The thickness of edges correlates with  
11 their PCC values. See Supplemental Table S1 for PCC values and the corresponding  
12 threshold in each dataset. The network graphs were created using Cytoscape.

13

14 **Supplemental Figure S2.** Transcript profiles for known and proposed BCAA catabolism  
15 genes under diurnal/circadian conditions.

16 Microarray data were obtained from the Diurnal database (Mockler et al., 2007), and  
17 normalized to the maximum expression levels of each gene in every treatment. Pearson's  
18 Correlation Coefficient and average linkage were used for gene clustering. Gene names  
19 in orange text represent members of the highly coexpressed module identified from the  
20 diurnal/circadian dataset. Refer to the Diurnal database website  
21 (<http://diurnal.mocklerlab.org/>) for detailed information on each condition. COL, Col-0;  
22 LDHH, 12h light/12h dark and 24h hot; SD, 8h light/16h dark; DD(DDHC), entrained on  
23 24h dark and 12h hot/12h cold, and subjected to 24h dark and 24h hot; LDHC, 12h  
24 light/12h dark and 12h hot/12h cold; LDHH-Smith, 12h light/12h dark and 24h hot  
25 (Smith et al., 2004); LDHH-Stitt, 12h light/12h dark and 24h hot (Bläsing et al., 2005);  
26 LL(LDHC), entrained on LDHC and subjected to 24h light and 24h hot; LL(LLHC),  
27 entrained on 24h light and 12h hot/12h cold, and subjected to 24h light and 24h hot;  
28 LL12(LDHH), entrained on LDHH and subjected to 24h light and 24h hot;  
29 LL23(LDHH), entrained on LDHH and subjected to 24h light and 24h hot; LLHC, 24h  
30 light and 12h hot/12h cold.

31

32 **Supplemental Figure S3.** Characterization of BCKDH complex subunit mutants.

33 (A) Schematic representations of the T-DNA insertion sites of newly characterized  
34 BCAA catabolic mutants. Exons are shown as white rectangles, UTRs as grey rectangles,  
35 and introns as solid lines. The sites of T-DNA insertion confirmed in this study are  
36 indicated by black triangles.

37 (B) Decreased BCAA catabolic enzyme transcript accumulation in *e1a1-1*, *e1a1-2*, *e1a2-*  
38 *1*, *e1b2-1*, and *mtlpd2-2* mutants. Values represent mean  $\pm$  SE from four biological  
39 replicates. An asterisk indicates a significant difference determined by the Student's *t*-test  
40 ( $p < 0.05$ ). ND, not detectable. The normalized *E1B2* transcript level in *e1b2-1* is less than  
41 0.5% relative to Col-0.

42

43 **Supplemental Figure S4.** Transcript and mutant analyses of *E1B1*-silenced *e1b2-1* lines.

44 (A) Relative *E1B1* transcript abundance in two homozygous *E1B1*-silenced *e1b2-1* T3  
45 lines (progeny seed pools of independent primary transformants #1 and #3) by qPCR.  
46 The y axis values represent the normalized *E1B1* transcript levels relative to Col-0  
47 (shown as the horizontal dashed line,  $n=5$ , mean  $\pm$  SE). The *E1B1* transcript levels were  
48 normalized to *ACT2* transcript levels. An asterisk indicates a significant difference from  
49 the wild type, determined by the Student's *t*-test ( $p < 0.05$ ). Leaf tissue samples were  
50 harvested by the end of night on a 16h light/8h dark photoperiod.

51 (B) Relative levels of seed free BCAAs in homozygous *E1B1*-silenced *e1b2-1* T4 seeds  
52 (progeny seed pools of #1 and #3). The y axis values represent the amino acid levels  
53 relative to Col-0 (shown as the dashed line,  $n=4$ , mean  $\pm$  SE). An asterisk indicates a  
54 significant difference from the wild type, determined by the Student's *t*-test ( $p < 0.05$ ).

55 (C) Relative levels of leaf free BCAAs in homozygous *E1B1*-silenced *e1b2-1* T3 lines  
56 (progeny seed pools of #1 and #3) after 6 days in prolonged darkness. The y axis values  
57 represent the amino acid levels relative to Col-0 (shown as the dashed line,  $n=5$ , mean  $\pm$   
58 SE). An asterisk indicates a significant difference from the wild type, determined by the  
59 Student's *t*-test ( $p < 0.05$ ).

60

61 **Supplemental Figure S5.** Phenotypes of BCAA mutants subjected to prolonged  
62 darkness.

63 Photographs of 5-week-old, short-day-grown Arabidopsis plants taken prior to (0d) and  
64 after 3, 6, 9 and 13 days of prolonged darkness. The leaves of *elal-1*, *elal-2*, both *elal*;  
65 *ela2* double mutants, *ivdl-2*, *mccal-1*, *mccb1-1*, and *hml1-2* were visibly yellowed and  
66 dehydrated following 13 days of prolonged darkness compared to the wild type. The  
67 *ivdl-2* mutant started showing visible senescence symptoms at day 6. The experiments  
68 were done at least three times with similar results, and representative results are shown.  
69 Plants in the upper and lower panels were grown and assayed in individual experiments.  
70 Two replicates were shown for each mutant at every time point.

71

72 **Supplemental Table S1.** Pairwise Pearson's Correlation Coefficients (PCCs) for  
73 transcripts of BCAA catabolism genes.

74 PCCs above the 95<sup>th</sup> percentile threshold for each dataset are highlighted in red, and the  
75 values are indicated below. Genes that have PCCs above threshold with at least one other  
76 gene are highlighted in yellow.

77

78 **Supplemental Table S2.** Mutant seed free amino acid profiles.

79 The mean represents the fold change between the averages of five biological replicates of  
80 mutants and Col-0 grown at the same time.

81 't-test' indicates the value at which the mean measurement deviates from expectation (for  
82 example '0.01' means significant at <0.01).

83

84 **Supplemental Table S3.** Mutant leaf free amino acid profiles in prolonged darkness.

85 The mean represents the average of five biological replicates ( $\mu\text{mol/mg}$ ).

86

87 **Supplemental Table S4.** Leaf amino acid profiles of *ivdl-2* relative to Col-0 at 6d and  
88 9d in prolonged darkness.

89 The mean represents the fold change between the averages of five biological replicates of  
90 *ivdl-2* and Col-0 at the same time point.

91

92 **Supplemental Table S5.** Primers for genotyping, qPCR and amiRNA generation.

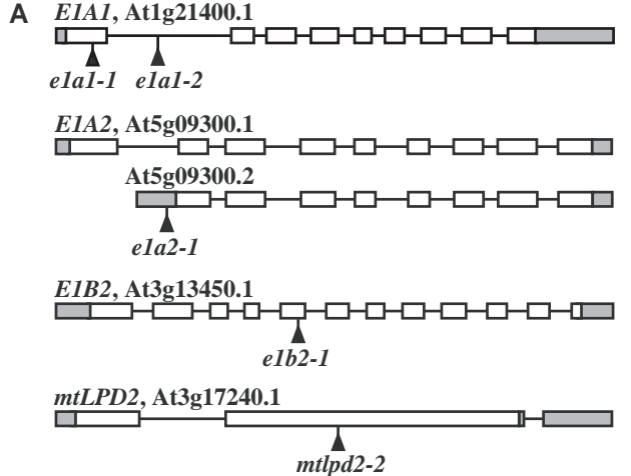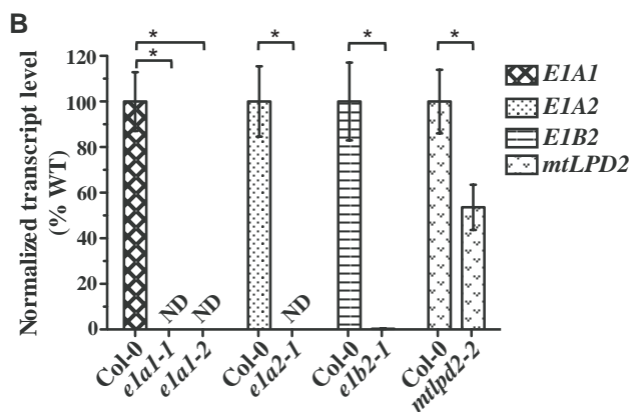

**Supplemental Figure S3.** Characterization of BCKDH complex subunit mutants. (A) Schematic representations of the T-DNA insertion sites of newly characterized BCAA catabolic mutants. Exons are shown as white rectangles, UTRs as grey rectangles, and introns as solid lines. The sites of T-DNA insertion confirmed in this study are indicated by black triangles. At5g09300.1 and At5g09300.2 correspond to alternatively spliced gene models. (B) Decreased BCAA catabolic enzyme transcript accumulation in *eia1-1*, *eia1-2*, *eia2-1*, *eib2-1*, and *mtlpd2-2* mutants. Values represent mean  $\pm$  SE from four biological replicates. An asterisk indicates a significant difference determined by the Student's *t*-test ( $p < 0.05$ ). ND, not detectable. The normalized *EIB2* transcript level in *eib2-1* is less than 0.5% relative to Col-0.
